# Supplementary material for: Metabolic consequences of inflammatory disruption of the blood-brain barrier in an organ-on-chip model of the human neurovascular unit
Source: J Neuroinflammation. 2016 Dec 12;13:306. doi: 10.1186/s12974-016-0760-y (PMC5153753; doi:10.1186/s12974-016-0760-y)
Supplement: Additional file 3: Table S2. — Tentative structural identifications. (XLSX 69 kb) [file 12974_2016_760_MOESM3_ESM.xlsx]

## Sheet: Vascular_0vs.6h_LPS
Compound	Accession	Chemical Formula	MassError(ppm)	Isotope.Similarity	m/z	Retentiontime(min)	Anova(p)	Fold Change	Name	Description	HMDB Link	Origins
9.92_313.1622m/z	HMDB28956	C12H26N4O3	-5.4	85.7	313.16	9.92	0.028	7.42	Lysyl-Lysine	Lysyl-Lysine is a dipeptied compoosed of two lysine residues. It is an incomplete breakdown product of protein digestion or protein catabolism. Some dipeptides are known to have physiological or cell-signaling effects although most are simply short-lived	http://www.hmdb.ca/metabolites/HMDB28956	|Endogenous|
9.92_313.1622m/z	HMDB03464	C5H11N3O2	9.3	93.2	313.16	9.92	0.028	7.42	4-Guanidinobutanoic acid	4-Guanidinobutanoate is a normal metabolite present in low concentrations. Patients with hyperargininemia have an arginase deficiency which leads to blockade of the urea cycle in the last step with several clinical symptoms. Owing to the arginase deficien	http://www.hmdb.ca/metabolites/HMDB03464	|Endogenous|
10.04_299.0835m/z	HMDB11737	C10H16N2O7	-5.4	94	299.08	10.04	0.017	Infinity	Gamma Glutamylglutamic acid	Gamma Glutamylglutamic acid is made of two glutamic acid molecules. Glutamic acid (Glu), also referred to as glutamate (the anion), is one of the 20 proteinogenic amino acids. It is not among the essential amino acids. Glutamate is a key molecule in cellu	http://www.hmdb.ca/metabolites/HMDB11737	|Endogenous|
10.04_299.0835m/z	HMDB42036	C10H16N2O7	-5.4	94	299.08	10.04	0.017	Infinity	Thymidine glycol	Thymidine glycol belongs to the family of Pyrimidine 2'-deoxyribonucleosides and Analogues. These are compounds consisting of a pyrimidine linked to a ribose which lacks an hydroxyl group at position 2.	http://www.hmdb.ca/metabolites/HMDB42036	|Endogenous|
18.61_171.1382m/z	HMDB12183	C10H18O2	1.4	92.9	171.14	18.61	0.00091	-2.12	8-Methylnonenoate	8-methyl-nonenoic acid is a fatty acid derivative from leucine/valine pathway.8-methyl-nonenoic acid plays a crucial role in determining the efficacy of capsaicin levels.It was evident that significantly high capsaicin was produced when 8-methyl-nonenoic	http://www.hmdb.ca/metabolites/HMDB12183	|Endogenous|Food|
10.79_253.1779m/z	HMDB41947	C11H24N3O2+	7.9	87.3	253.18	10.79	0.0011	Infinity	N1,N8-Diacetylspermidine	N1,n8-diacetylspermidine belongs to the family of Dialkylamines. These are organic compounds containing a dialkylamine group.	http://www.hmdb.ca/metabolites/HMDB41947	|Endogenous|
16.50_429.3168m/z	HMDB10727	C12H22O3	-10	89.8	429.32	16.5	0.0034	Infinity	3-Oxododecanoic acid	In humans fatty acids are predominantly formed in the liver and adipose tissue, and mammary glands during lactation. 3-Oxo-Dodecanoic acid is an intermediate in fatty acid biosynthesis. Specifically, 3-Oxo-Dodecanoic acid is converted form Malonic acid vi	http://www.hmdb.ca/metabolites/HMDB10727	|Endogenous|Food|
23.92_112.0860m/z	HMDB00870	C5H9N3	-7.9	96.4	112.09	23.92	0.019	-2	Histamine	Histamine is an amine derived by enzymatic decarboxylation of histidine. It is a powerful stimulant of gastric secretion, a constrictor of bronchial smooth muscle, a vasodilator, and also a centrally acting neurotransmitter.	http://www.hmdb.ca/metabolites/HMDB00870	|Endogenous|
18.61_171.1382m/z	HMDB02203	C10H20O3	1.3	92.6	171.14	18.61	0.00091	-2.12	3-Hydroxycapric acid	3-hydroxycapric acid is a normally occurring carboxylic acid in human blood plasma. Medium- and long-chain 3-hydroxymonocarboxylic acids represent intermediates in the beta-oxidation of fatty acids. They accumulate in the plasma of patients with an inheri	http://www.hmdb.ca/metabolites/HMDB02203	|Endogenous|
18.61_171.1382m/z	HMDB10725	C10H20O3	1.3	92.6	171.14	18.61	0.00091	-2.12	(R)-3-Hydroxydecanoic acid	In humans fatty acids are predominantly formed in the liver and adipose tissue, and mammary glands during lactation.(R)-3-Hydroxydecanoic acid is an intermediate in fatty acid biosynthesis. Specifically,(R)-3-Hydroxydecanoic acid is converted from 3-Oxode	http://www.hmdb.ca/metabolites/HMDB10725	|Endogenous|
18.61_171.1382m/z	HMDB10726	C10H18O2	1.4	92.9	171.14	18.61	0.00091	-2.12	trans-Dec-2-enoic acid	In humans fatty acids are predominantly formed in the liver and adipose tissue, and mammary glands during lactation. trans-Dec-2-enoic acid is an intermediate in fatty acid biosynthesis. Specifically, trans-Dec-2-enoic is converted from (R)-3-Hydroxydecan	http://www.hmdb.ca/metabolites/HMDB10726	|Endogenous|Food|
18.61_171.1382m/z	HMDB04980	C10H18O2	1.4	92.9	171.14	18.61	0.00091	-2.12	cis-4-Decenoic acid	4-Decenoic acid (and other intermediates of unsaturated fatty acid oxidation) has been found in increased amounts in liver, skeletal muscle and heart obtained post mortem from patients with medium-chain acyl-CoA dehydrogenase deficiency (MCADD), multiple	http://www.hmdb.ca/metabolites/HMDB04980	|Endogenous|Food|
16.07_463.3024m/z	HMDB02013	C11H21NO4	2.3	96.5	463.3	16.07	0.0083	6.04	Butyrylcarnitine	Butyrylcarnitine is elevated in patients with acyl-coa dehydrogenase, short-chain (SCAD) deficiencyin; in infants with acute acidosis and generalized muscle weakness; and in middle-aged patients with chronic myopathy localized in muscle. (OMIM 201470).	http://www.hmdb.ca/metabolites/HMDB02013	|Endogenous|Food|
16.07_463.3024m/z	HMDB00736	C11H21NO4	2.3	96.5	463.3	16.07	0.0083	6.04	Isobutyryl-L-carnitine	Isobutyryl-L-carnitine is a product of the acyl-CoA dehydrogenases (ACADs), which are a group of mitochondrial enzymes involved in the metabolism of fatty acids or branched-chain amino acids. (OMIM 600301 ).	http://www.hmdb.ca/metabolites/HMDB00736	|Endogenous|Food|
13.13_203.0231m/z	HMDB12208	C6H11N2O6P	6.4	91.7	203.02	13.13	0.0014	5.85	D-Erythro-imidazole-glycerol-phosphate	D-Erythro-imidazole-glycerol-phosphate is an intermediate in Histidine metabolism. It is a substrate for imidazoleglycerol-phosphate dehydratase (hisB) and can be generated from Phosphoribulosyl-formimino-AICAR-phosphate then it is converted to Imidazole-	http://www.hmdb.ca/metabolites/HMDB12208	|Endogenous|
13.13_203.0231m/z	HMDB12236	C6H9N2O5P	6.9	91.9	203.02	13.13	0.0014	5.85	Imidazole acetol-phosphate	Imidazole acetol-phosphate is involved in the histidine biosynthesis I pathway. Imidazole acetol-phosphate is created by the breakdown of D-erythro-imidazole-glycerol-phosphate into imidazole acetol-phosphate and H2O. Imidazoleglycerol-phosphate dehydrata	http://www.hmdb.ca/metabolites/HMDB12236	|Endogenous|
5.30_279.1743m/z	HMDB12789	C20H26O3	-0.2	85.3	279.17	5.3	0.00056	2.42	4-Oxo-13-cis-retinoate	4-oxo-9-cis retinoic acid (4-oxo-9cRA) is identified as a major plasma metabolite of 9-cis retinoic acid. Plasma levels of 4-oxo-9-cRA were initially 71% of those of 9cRA, but in contrast to 9cRA, there was no decline in plasma levels.Despite a decline in	http://www.hmdb.ca/metabolites/HMDB12789	|Endogenous|Food|
5.86_295.1519m/z	HMDB30555	C16H22O5	-7	89.1	295.15	5.86	0.033	2.25	Tocopheronic acid	Human metabolite of a-Tocopherol <ht>BDR14-R</ht> Tocopheronic acid belongs to the family of Medium-chain Keto Acids and Derivatives. These are keto acids with a 6 to 12 carbon atoms long side chain.	http://www.hmdb.ca/metabolites/HMDB30555	|Endogenous|Food|
4.54_263.1981m/z	HMDB12535	C17H28O3	-8.6	84.6	263.2	4.54	0.0067	2.08	12S-HHT	12(S)-HHTrE is an unusual product of the cyclooxygenase (COX) pathway and one of the primary arachidonic acid metabolites of the human platelet.1 It is biosynthesized by thromboxane (TX) synthesis from prostaglandin H2 (PGH2) concurrently with TXA2. The b	http://www.hmdb.ca/metabolites/HMDB12535	|Endogenous|Food|
4.54_263.1981m/z	HMDB00557	C6H13NO2	6.1	95.3	263.2	4.54	0.0067	2.08	L-Alloisoleucine	L-alloisoleucine is a branched chain amino acid and is a stereo-isomer of L-isoleucine. It is a common constituent of human plasma (albeit at low levels). L-alloisoleucine is produced as a byproduct of isoleucine transamination. L-Isoleucine is one of the	http://www.hmdb.ca/metabolites/HMDB00557	|Endogenous|
4.54_263.1981m/z	HMDB01645	C6H13NO2	6.1	95.3	263.2	4.54	0.0067	2.08	L-Norleucine	L-Norleucine is an unnatural amino acid that is used experimentally to study protein structure and function. It is structurally similar to methionine, however it does not contain sulfur. Aminocaproic acid works as an antifibrinolytic. It is a derivative o	http://www.hmdb.ca/metabolites/HMDB01645	|Endogenous|
4.54_263.1981m/z	HMDB03640	C6H13NO2	6.1	95.3	263.2	4.54	0.0067	2.08	Beta-Leucine	Beta-leucine is a metabolite that is in the middle of a controversy over its presence in the human body. While there are reports that claim it as a human metabolite, there are others that deny its existence. Two examples:. Circulating levels of beta-leuci	http://www.hmdb.ca/metabolites/HMDB03640	|Endogenous|
4.54_263.1981m/z	HMDB13773	C6H13NO2	6.1	95.3	263.2	4.54	0.0067	2.08	D-Leucine	An essential branched-chain amino acid important for hemoglobin formation. [PubChem]; Branched chain amino acids (BCAA) are essential amino acids whose carbon structure is marked by a branch point. These three amino acids are critical to human life and ar	http://www.hmdb.ca/metabolites/HMDB13773	|Endogenous|
4.71_263.1981m/z	HMDB12535	C17H28O3	-8.6	87.5	263.2	4.71	0.00056	2.29	12S-HHT	12(S)-HHTrE is an unusual product of the cyclooxygenase (COX) pathway and one of the primary arachidonic acid metabolites of the human platelet.1 It is biosynthesized by thromboxane (TX) synthesis from prostaglandin H2 (PGH2) concurrently with TXA2. The b	http://www.hmdb.ca/metabolites/HMDB12535	|Endogenous|Food|
4.71_263.1981m/z	HMDB00557	C6H13NO2	6.1	98.5	263.2	4.71	0.00056	2.29	L-Alloisoleucine	L-alloisoleucine is a branched chain amino acid and is a stereo-isomer of L-isoleucine. It is a common constituent of human plasma (albeit at low levels). L-alloisoleucine is produced as a byproduct of isoleucine transamination. L-Isoleucine is one of the	http://www.hmdb.ca/metabolites/HMDB00557	|Endogenous|
4.71_263.1981m/z	HMDB01645	C6H13NO2	6.1	98.5	263.2	4.71	0.00056	2.29	L-Norleucine	L-Norleucine is an unnatural amino acid that is used experimentally to study protein structure and function. It is structurally similar to methionine, however it does not contain sulfur. Aminocaproic acid works as an antifibrinolytic. It is a derivative o	http://www.hmdb.ca/metabolites/HMDB01645	|Endogenous|
4.71_263.1981m/z	HMDB03640	C6H13NO2	6.1	98.5	263.2	4.71	0.00056	2.29	Beta-Leucine	Beta-leucine is a metabolite that is in the middle of a controversy over its presence in the human body. While there are reports that claim it as a human metabolite, there are others that deny its existence. Two examples:. Circulating levels of beta-leuci	http://www.hmdb.ca/metabolites/HMDB03640	|Endogenous|
4.71_263.1981m/z	HMDB13773	C6H13NO2	6.1	98.5	263.2	4.71	0.00056	2.29	D-Leucine	An essential branched-chain amino acid important for hemoglobin formation. [PubChem]; Branched chain amino acids (BCAA) are essential amino acids whose carbon structure is marked by a branch point. These three amino acids are critical to human life and ar	http://www.hmdb.ca/metabolites/HMDB13773	|Endogenous|
8.16_331.2081m/z	HMDB02172	C14H30N4O2	0.3	87.7	331.21	8.16	0.0078	2.21	N1,N12-Diacetylspermine	N1,N12-Diacetylspermine is a polyamine commonly occurring in normal human urine (PMID 7775374). It has been reported that urinary N1,N12-Diacetylspermine can be used as a marker to efficiently detect colorectal and breast cancers at early stages (PMID 158	http://www.hmdb.ca/metabolites/HMDB02172	|Endogenous|
7.79_322.1337m/z	HMDB11664	C9H7N	8.5	90.4	322.13	7.79	0.026	Infinity	3-Methylene-indolenine	3-Methylene-indolenine is an electrophilic molecule produced by the action of cytochrome P450 2F1 on 3-methylindole (3MI). 3-Methylindole (3MI) is a naturally occurring pulmonary toxin that requires metabolic activation. In particular, 3MI-induced pneumot	http://www.hmdb.ca/metabolites/HMDB11664	|Endogenous|
8.22_233.1727m/z	HMDB00689	C6H12O2	-8.7	93.2	233.17	8.22	0.032	2.71	Isocaproic acid	Isocaproic acid, a metabolite of 20 alpha-hydroxycholesterol (PMID 14446007) and is an important metabolite in early placentas enabling the convertion from cholesterol to pregnenolone to Dehydroepiandrosterone (DHEA) (PMID 11972299).	http://www.hmdb.ca/metabolites/HMDB00689	|Endogenous|Food|
9.57_313.1626m/z	HMDB28956	C12H26N4O3	-3.7	89.8	313.16	9.57	0.00011	2.88	Lysyl-Lysine	Lysyl-Lysine is a dipeptied compoosed of two lysine residues. It is an incomplete breakdown product of protein digestion or protein catabolism. Some dipeptides are known to have physiological or cell-signaling effects although most are simply short-lived	http://www.hmdb.ca/metabolites/HMDB28956	|Endogenous|
6.32_213.0747m/z	HMDB00913	C10H12O5	-5.1	92.7	213.07	6.32	0.00071	-4.91	Vanillactic acid	Vanillactic acid is an acidic catecholamine metabolite present in normal human urine (PMID 7524950), in normal human CSF (PMID 7914240), and increased in the CSF of newborns with neonatal epileptic encephalopathy mimicking aromatic L-amino acid decarboxyl	http://www.hmdb.ca/metabolites/HMDB00913	|Endogenous|
6.32_213.0747m/z	HMDB00325	C8H14O5	7	94.6	213.07	6.32	0.00071	-4.91	3-Hydroxysuberic acid	3-Hydroxysuberic acid is a metabolite derived from the w-oxidation of 3-hydroxy fatty acids and the subsequent beta-oxidation of longer-chain 3-hydroxy dicarboxylic acids (PMID 2001377). It has been found increased in ketoaciduria (PMID 1591279).	http://www.hmdb.ca/metabolites/HMDB00325	|Endogenous|
6.32_213.0747m/z	HMDB03416	C6H14N4O2	-0.9	96	213.07	6.32	0.00071	-4.91	D-Arginine	D-Arginine is an essential amino acid that is physiologically active in the L-form.	http://www.hmdb.ca/metabolites/HMDB03416	|Endogenous|
6.13_243.1352m/z	HMDB13835	C16H22O4	-9.9	88	243.14	6.13	0.02	5.67	Diisobutyl phthalate	DIBP is an odorless plasticizer and has excellent heat and light stability. It is the lowest cost plasticizer for cellulose nitrate. DIBP has lower density and freezing point than DBP (dibutyl phthalate, CAS No.: 84-74-2). It has similar properties as dib	http://www.hmdb.ca/metabolites/HMDB13835	|Endogenous|
6.13_243.1352m/z	HMDB01518	C16H22O4	-9.9	88	243.14	6.13	0.02	5.67	Alpha-CEHC	2,5,7,8-tetramethyl-2-(2'-carboxyethyl)-6-hydroxychroman (alpha-CEHC) has been identified as a major water-soluble metabolite of vitamin E, which circulates in the blood and is excreted with the urine. (PMID 12420750).	http://www.hmdb.ca/metabolites/HMDB01518	|Endogenous|
6.13_243.1352m/z	HMDB13248	C16H22O4	-9.9	88	243.14	6.13	0.02	5.67	Monoethylhexyl phthalic acid	Monoethylhexyl phthalic acid (MEHP) is an active metabolite of Bis(2-ethylhexyl)phthalate (DEHP). DEHP measured from the blood of pregnant women have been significantly associated with the decreased penis width, shorter anogenital distance, and the incomp	http://www.hmdb.ca/metabolites/HMDB13248	|Endogenous|
6.13_243.1352m/z	HMDB11170	C11H20N2O5	4.9	92	243.14	6.13	0.02	5.67	L-gamma-glutamyl-L-isoleucine	L-gamma-glutamyl-l-isoleucine is a proteolytic breakdown product of larger proteins. It belongs to the family of N-acyl-alpha Amino Acids and Derivatives. These are compounds containing an alpha amino acid which bears an acyl group at his terminal nitroge	http://www.hmdb.ca/metabolites/HMDB11170	|Endogenous|
6.13_243.1352m/z	HMDB11171	C11H20N2O5	4.9	92	243.14	6.13	0.02	5.67	L-gamma-glutamyl-L-leucine	L-gamma-glutamyl-l-leucine is a proteolytic breakdown product of larger proteins. It belongs to the family of N-acyl-alpha Amino Acids and Derivatives. These are compounds containing an alpha amino acid which bears an acyl group at his terminal nitrogen a	http://www.hmdb.ca/metabolites/HMDB11171	|Endogenous|
6.13_243.1352m/z	HMDB13817	C14H20O2	-1.5	90.4	243.14	6.13	0.02	5.67	2,6-Di-tert-butylbenzoquinone	2,6-di-tert-butylbenzoquinone is not used for fragrances or flavors.	http://www.hmdb.ca/metabolites/HMDB13817	|Endogenous|
6.13_555.2228m/z	HMDB28971	C10H19N3O4S	-6.8	93.9	555.22	6.13	0.042	3.65	Methionyl-Glutamine	Methionyl-Glutamine is a dipeptide composed of methionine and glutamine. It is an incomplete breakdown product of protein digestion or protein catabolism. Some dipeptides are known to have physiological or cell-signaling effects although most are simply s	http://www.hmdb.ca/metabolites/HMDB28971	|Endogenous|
6.13_555.2228m/z	HMDB28803	C10H19N3O4S	-6.8	93.9	555.22	6.13	0.042	3.65	Glutaminyl-Methionine	Glutaminyl-Methionine is a dipeptide composed of glutamine and methionine. It is an incomplete breakdown product of protein digestion or protein catabolism. Some dipeptides are known to have physiological or cell-signaling effects although most are simply	http://www.hmdb.ca/metabolites/HMDB28803	|Endogenous|
6.13_555.2228m/z	HMDB28987	C10H19N3O4S	-6.8	93.9	555.22	6.13	0.042	3.65	Methionyl-Gamma-glutamate	Methionyl-Gamma-glutamate is a dipeptide composed of methionine and gamma-glutamate. It is an incomplete breakdown product of protein digestion or protein catabolism. Some dipeptides are known to have physiological or cell-signaling effects although most	http://www.hmdb.ca/metabolites/HMDB28987	|Endogenous|
6.13_555.2228m/z	HMDB29155	C10H19N3O4S	-6.8	93.9	555.22	6.13	0.042	3.65	Gamma-glutamyl-Methionine	Gamma-glutamyl-Methionine is a dipeptide composed of gamma-glutamate and methionine. It is an incomplete breakdown product of protein digestion or protein catabolism. Some dipeptides are known to have physiological or cell-signaling effects although most	http://www.hmdb.ca/metabolites/HMDB29155	|Endogenous|
6.48_412.2098m/z	HMDB13327	C19H35NO6	0.6	86.7	412.21	6.48	0.027	Negative Infinity	Dodecanedioylcarnitine		http://www.hmdb.ca/metabolites/HMDB13327	|Endogenous|
7.19_352.1331m/z	HMDB12322	C10H8O	7.8	89.5	352.13	7.19	0.049	12.29	2-Naphthol	2-Naphthol is a colorless crystalline solid and an isomer of 1-naphthol, differing by the location of the hydroxyl group on naphthalene. The naphthols are naphthalene homologues of phenol, with the hydroxyl group being more reactive than in the phenols. 2	http://www.hmdb.ca/metabolites/HMDB12322	|Endogenous|
7.19_352.1331m/z	HMDB06215	C10H8O	7.8	89.5	352.13	7.19	0.049	12.29	Naphthalene epoxide	Naphthalene epoxide is an epoxide derivative of naphthalene. The toxicity of naphthalene has to do with the Phase I metabolism of this compound by cytochrome P450 monooxygenases. Deactivation of naphthalene involves epoxidation followed by glutathione con	http://www.hmdb.ca/metabolites/HMDB06215	|Endogenous|
4.96_144.1540m/z	HMDB15177	C12H21N	2.76681	87.3838	144.154	4.95663	0.00204281	-5.36275	Memantine	Memantine is an amantadine derivative with low to moderate-affinity for NMDA receptors. It is a noncompetitive NMDA receptor antagonist that binds preferentially to NMDA receptor-operated cation channels. It blocks the effects of excessive levels of gluta	http://www.hmdb.ca/metabolites/HMDB15177	|Drug|
5.30_279.1743m/z	HMDB06285	C20H26O3	-0.183955	85.2504	279.174	5.29998	0.000558194	2.41702	4-oxo-Retinoic acid	4-oxo-Retinoic acid is a biologically active geometric isomer of retinoic acid (RA). 4-oxo-retinoic acid is generated from its precursor canthaxanthin and enhances gap junctional communication in cells. Metabolic transformation of all-trans RA to 4-hydrox	http://www.hmdb.ca/metabolites/HMDB06285	|Drug metabolite|Endogenous|Food|
8.08_456.1254m/z	HMDB42044	C21H23NO9	-2.49201	86.1758	456.125	8.07747	0.000283659	53.8362	Tolmetin glucuronide	Tolmetin glucuronide belongs to the family of Glucuronic Acid Derivatives. These are compounds containing a glucuronic acid moeity (or a derivative), which consists of a glucose moiety with the C6 carbon oxidized to a carboxylic acid.	http://www.hmdb.ca/metabolites/HMDB42044	|Drug metabolite|Endogenous|
8.39_456.1249m/z	HMDB42044	C21H23NO9	-3.68983	88.792	456.125	8.39203	0.000629762	11.6771	Tolmetin glucuronide	Tolmetin glucuronide belongs to the family of Glucuronic Acid Derivatives. These are compounds containing a glucuronic acid moeity (or a derivative), which consists of a glucose moiety with the C6 carbon oxidized to a carboxylic acid.	http://www.hmdb.ca/metabolites/HMDB42044	|Drug metabolite|Endogenous|
6.32_213.0747m/z	HMDB00517	C6H14N4O2	-0.911951	96.0332	213.075	6.32483	0.000707547	-4.91368	L-Arginine	Arginine is an essential amino acid that is physiologically active in the L-form. In mammals, arginine is formally classified as a semiessential or conditionally essential amino acid, depending on the developmental stage and health status of the individua	http://www.hmdb.ca/metabolites/HMDB00517	|Drug|Drug metabolite|Food|

## Sheet: Vascular_0vs.24h_LPS
Compound	Accession	Chemical Formula	MassError(ppm)	Isotope.Similarity	m/z	Retentiontime(min)	Anova(p)	Fold Change	Name	description	HMDB Link	Origins
8.39_456.1249m/z	HMDB42044	C21H23NO9	-3.68983	88.792	456.125	8.39203	0.025875	7.58242	Tolmetin glucuronide	Tolmetin glucuronide belongs to the family of Glucuronic Acid Derivatives. These are compounds containing a glucuronic acid moeity (or a derivative), which consists of a glucose moiety with the C6 carbon oxidized to a carboxylic acid.	http://www.hmdb.ca/metabolites/HMDB42044	|Drug metabolite|Endogenous|
8.08_456.1254m/z	HMDB42044	C21H23NO9	-2.49201	86.1758	456.125	8.07747	0.00194776	33.9624	Tolmetin glucuronide	Tolmetin glucuronide belongs to the family of Glucuronic Acid Derivatives. These are compounds containing a glucuronic acid moeity (or a derivative), which consists of a glucose moiety with the C6 carbon oxidized to a carboxylic acid.	http://www.hmdb.ca/metabolites/HMDB42044	|Drug metabolite|Endogenous|
5.30_279.1743m/z	HMDB06285	C20H26O3	-0.183955	85.2504	279.174	5.29998	3.64515e-06	4.33595	4-oxo-Retinoic acid	4-oxo-Retinoic acid is a biologically active geometric isomer of retinoic acid (RA). 4-oxo-retinoic acid is generated from its precursor canthaxanthin and enhances gap junctional communication in cells. Metabolic transformation of all-trans RA to 4-hydrox	http://www.hmdb.ca/metabolites/HMDB06285	|Drug metabolite|Endogenous|Food|
5.01_279.1747m/z	HMDB06285	C20H26O3	1.26212	81.0378	279.175	5.00905	1.22547e-05	12.4566	4-oxo-Retinoic acid	4-oxo-Retinoic acid is a biologically active geometric isomer of retinoic acid (RA). 4-oxo-retinoic acid is generated from its precursor canthaxanthin and enhances gap junctional communication in cells. Metabolic transformation of all-trans RA to 4-hydrox	http://www.hmdb.ca/metabolites/HMDB06285	|Drug metabolite|Endogenous|Food|
8.60_293.1489m/z	HMDB00145	C18H22O2	-8.50531	81.7973	293.149	8.60173	0.0320838	-2.03817	Estrone	Estrone is a major mammalian estrogen. The conversion of the natural C19 steroids, testosterone and androstenedione into estrone is dependent on a complex key reaction catalyzed by the cytochrome P450 aromatase (EC 1.14.14.1, unspecific monooxygenase), wh	http://www.hmdb.ca/metabolites/HMDB00145	|Drug metabolite|Endogenous|Food|
4.94_126.0314n	HMDB13674	C6H6O3	-2.1	95.9	127.04	4.94	3.7e-12	2.83	1,2,3-Trihydroxybenzene	Pyrogallol or benzene-1,2,3-triol is a benzenetriol. It is a white crystalline powder and a powerful reducing agent. It was first prepared by Scheele 1786 by heating gallic acid. An alternate preparation is heating para-chlorophenoldisulphonic acid with p	http://www.hmdb.ca/metabolites/HMDB13674	|Endogenous|
4.94_126.0314n	HMDB13675	C6H6O3	-2.1	95.9	127.04	4.94	3.7e-12	2.83	1,3,5-Trihydroxybenzene	Phloroglucinol is a benzenetriol. It is an organic compound that is used in the synthesis of pharmaceuticals and explosives. This molecule exists in two forms, or tautomers, 1,3,5-trihydroxybenzene, which has phenol-like, and 1,3,5-cyclohexanetrione (phlo	http://www.hmdb.ca/metabolites/HMDB13675	|Endogenous|
6.66_162.1017n	HMDB00450	C6H14N2O3	7.7	94.4	204.14	6.66	0.029	2.71	5-Hydroxylysine	5-Hydroxylysine is a hydroxylated derivative of the amino acid lysine that is present in certain collagens. Hydroxylysine is an amino acid and is most widely known as a component of collagen. A standard amino acid with the R' group consisting of an amino	http://www.hmdb.ca/metabolites/HMDB00450	|Endogenous|
6.31_129.0785n	HMDB04226	C6H11NO2	-3.8	97.9	322.18	6.31	0.0042	2.65	N4-Acetylaminobutanal	N4-Acetylaminobutanal is an intermediate of the urea cycle and metabolism of amino groups, the product of the enzyme monoamine oxidase A [EC:1.4.3.4] and the substrate of the enzyme aldehyde dehydrogenase 2 family (mitochondrial) [EC:1.2.1.3].	http://www.hmdb.ca/metabolites/HMDB04226	|Endogenous|
6.31_129.0785n	HMDB05960	C6H11NO2	-3.8	97.9	322.18	6.31	0.0042	2.65	D-Pipecolic acid	D-Pipecolic acid is a normal human metabolite found in human biofluids. Normal adults excrete pipecolic acid primarily as the D-enantiomer even though it is present in the blood stream mainly as the L-enantiomer. It is believed that D-Pipecolic acid origi	http://www.hmdb.ca/metabolites/HMDB05960	|Endogenous|
6.31_129.0785n	HMDB00716	C6H11NO2	-3.8	97.9	322.18	6.31	0.0042	2.65	L-Pipecolic acid	L-Pipecolic acid is a normal human metabolite present in human blood, where is present as the primary enantiomer of pipecolic acid. L-Pipecolic acid is a cyclic imino acid produced during the degradation of lysine, accumulates in body fluids of infants wi	http://www.hmdb.ca/metabolites/HMDB00716	|Endogenous|
6.66_129.0789n	HMDB04226	C6H11NO2	-0.4	99	322.18	6.66	0.0027	2.74	N4-Acetylaminobutanal	N4-Acetylaminobutanal is an intermediate of the urea cycle and metabolism of amino groups, the product of the enzyme monoamine oxidase A [EC:1.4.3.4] and the substrate of the enzyme aldehyde dehydrogenase 2 family (mitochondrial) [EC:1.2.1.3].	http://www.hmdb.ca/metabolites/HMDB04226	|Endogenous|
6.66_129.0789n	HMDB05960	C6H11NO2	-0.4	99	322.18	6.66	0.0027	2.74	D-Pipecolic acid	D-Pipecolic acid is a normal human metabolite found in human biofluids. Normal adults excrete pipecolic acid primarily as the D-enantiomer even though it is present in the blood stream mainly as the L-enantiomer. It is believed that D-Pipecolic acid origi	http://www.hmdb.ca/metabolites/HMDB05960	|Endogenous|
6.66_129.0789n	HMDB00716	C6H11NO2	-0.4	99	322.18	6.66	0.0027	2.74	L-Pipecolic acid	L-Pipecolic acid is a normal human metabolite present in human blood, where is present as the primary enantiomer of pipecolic acid. L-Pipecolic acid is a cyclic imino acid produced during the degradation of lysine, accumulates in body fluids of infants wi	http://www.hmdb.ca/metabolites/HMDB00716	|Endogenous|
4.61_596.2389n	HMDB05775	C29H36N6O6S	-4.7	76.4	597.24	4.61	1.7e-05	-2	Tetragastrin	Tetragastrin is the C-terminal tetrapeptide of gastrin. It is the smallest peptide fragment of gastrin which has the same physiological and pharmacological activity as gastrin.	http://www.hmdb.ca/metabolites/HMDB05775	|Endogenous|
9.14_335.2176m/z	HMDB10221	C18H32O4	-5.5	81.3	335.22	9.14	0.018	-2.72	9,10-DiHODE	9,10-DiHODE or 9,10-dihydroxy-12Z,15Z- octadecadienoic acid is an oxylipin. It is a double oxidation product of octadeadienoic acid generated through the action of CYP450 on linolenic acid (PMID: 6301473). Specifically cytochrome P-450 catalyzed epoxidati	http://www.hmdb.ca/metabolites/HMDB10221	|Endogenous|
9.14_335.2176m/z	HMDB10201	C18H32O4	-5.5	81.3	335.22	9.14	0.018	-2.72	12,13-DiHODE	12,13-DiHODE is an oxygenated lipid found in human blood. This compound belongs to the octadecanoid class of fatty acyls. (Lipid Maps).	http://www.hmdb.ca/metabolites/HMDB10201	|Endogenous|
9.14_335.2176m/z	HMDB10208	C18H32O4	-5.5	81.3	335.22	9.14	0.018	-2.72	15,16-DiHODE	15,16-DiHODE is an oxygenated lipid found in human blood. This fatty acyl belongs to the main class of octadecanoids and the sub class of other octadecanoids. (Lipid Maps).	http://www.hmdb.ca/metabolites/HMDB10208	|Endogenous|
9.52_283.1163m/z	HMDB28742	C15H18N4O4	-8.4	86.5	283.12	9.52	0.019	2.04	Asparaginyl-Tryptophan	Asparaginyl-Tryptophan is a dipeptide composed of asparagine and tryptophan. It is an incomplete breakdown product of protein digestion or protein catabolism. Some dipeptides are known to have physiological or cell-signaling effects although most are simp	http://www.hmdb.ca/metabolites/HMDB28742	|Endogenous|
9.52_283.1163m/z	HMDB28897	C15H18N4O4	-8.4	86.5	283.12	9.52	0.019	2.04	Histidinyl-Tyrosine	Histidinyl-Tyrosine is a dipeptide composed of histidine and tyrosine. It is an incomplete breakdown product of protein digestion or protein catabolism. Some dipeptides are known to have physiological or cell-signaling effects although most are simply sho	http://www.hmdb.ca/metabolites/HMDB28897	|Endogenous|
9.52_283.1163m/z	HMDB29107	C15H18N4O4	-8.4	86.5	283.12	9.52	0.019	2.04	Tyrosyl-Histidine	Tyrosyl-Histidine is a dipeptide composed of tyrosine and histidine. It is an incomplete breakdown product of protein digestion or protein catabolism. Some dipeptides are known to have physiological or cell-signaling effects although most are simply short	http://www.hmdb.ca/metabolites/HMDB29107	|Endogenous|
9.52_283.1163m/z	HMDB29078	C15H18N4O4	-8.4	86.5	283.12	9.52	0.019	2.04	Tryptophyl-Asparagine	Tryptophyl-Asparagine is a dipeptide composed of tryptophan and asparagine. It is an incomplete breakdown product of protein digestion or protein catabolism. Some dipeptides are known to have physiological or cell-signaling effects although most are simpl	http://www.hmdb.ca/metabolites/HMDB29078	|Endogenous|
9.52_283.1163m/z	HMDB01864	C6H10O3	4.1	97.1	283.12	9.52	0.019	2.04	2-Ketohexanoic acid	2-Ketohexanoic acid is a potent insulin secretagogue. (PMID 7045091). 2-Ketohexanoic acid directly inhibits the ATP-sensitive K+ channel (KATP channel) in pancreatic beta-cells (stimulated in isolated mouse islets), but it is unknown whether direct KATP c	http://www.hmdb.ca/metabolites/HMDB01864	|Endogenous|
9.52_283.1163m/z	HMDB10717	C6H10O3	4.1	97.1	283.12	9.52	0.019	2.04	3-Oxohexanoic acid	3-Oxohexanoic acid is fatty acid formed by the action of Fatty acid synthases from acetyl-CoA and malonyl-CoA precursors. This fatty acid is involved in fatty acid biosynthesis. Specifically, it is the product of reaction between malonic acid and three en	http://www.hmdb.ca/metabolites/HMDB10717	|Endogenous|
9.52_283.1163m/z	HMDB06024	C6H10O3	4.1	97.1	283.12	9.52	0.019	2.04	Mevalonolactone	Mevalonolactone is a substance obtained by the dehydration of mevalonic acid and is rapidly converted back into mevalonic acid in water. Mevaolonic acid exists in equilibrium with mevalolactone, which is formed by internal condensation of mevalonic acid's	http://www.hmdb.ca/metabolites/HMDB06024	|Endogenous|
9.57_313.1626m/z	HMDB28956	C12H26N4O3	-3.7	89.8	313.16	9.57	0.00057	2.29	Lysyl-Lysine	Lysyl-Lysine is a dipeptied compoosed of two lysine residues. It is an incomplete breakdown product of protein digestion or protein catabolism. Some dipeptides are known to have physiological or cell-signaling effects although most are simply short-lived	http://www.hmdb.ca/metabolites/HMDB28956	|Endogenous|
9.54_201.1127m/z	HMDB00350	C10H18O5	2.6	91	201.11	9.54	0.045	5	3-Hydroxysebacic acid	3-Hydroxysebacic acid is a normal urinary 3-hydroxydicarboxylic acid metabolite and can be elevated in patients with peroxisomal disorders such as Zellweger syndrome. Marked elevation of urinary 3- Hydroxysebacic acid has also been described in a malnouri	http://www.hmdb.ca/metabolites/HMDB00350	|Endogenous|
9.54_201.1127m/z	HMDB00424	C10H18O5	2.6	91	201.11	9.54	0.045	5	2-Hydroxydecanedioic acid	2-Hydroxydecanedioic acid appears in the urine of children affected with peroxisomal disorders such as urines of children with neonatal adrenoleukodystrophy and Zellweger syndrome and is a useful marker for these diseases. (PMID 2943344).	http://www.hmdb.ca/metabolites/HMDB00424	|Endogenous|
9.54_201.1127m/z	HMDB02167	C5H8O2	2.9	96.8	201.11	9.54	0.045	5	3-Methylbutyrolactone	3-methylbutyrolactone is lactone of 4-hydroxyisovaleric acid and it has been found in the urine of patients with isovaleric acidemia, an autosomal recessive genetic disorder of the enzyme isovaleryl-CoA dehydrogenase (PMID 6452974; PMID 6616835). Isovaler	http://www.hmdb.ca/metabolites/HMDB02167	|Endogenous|
9.05_313.0987m/z	HMDB12267	C11H18N2O7	-6.8	90.3	313.1	9.05	0.04	-2.51	N-Succinyl-L,L-2,6-diaminopimelate	N-Succinyl-L,L-2,6-diaminopimelate is an intermediate in lysine biosynthesis. It is the third to last step in the synthesis of lysine and is converted. from N-Succinyl-2-amino-6-ketopimelate via the enzyme succinyldiaminopimelate transferase (EC 2.6.1.17)	http://www.hmdb.ca/metabolites/HMDB12267	|Endogenous|
9.05_189.0701m/z	HMDB28973	C7H14N2O3S	4.3	89.3	189.07	9.05	0.0051	-2.12	Methionyl-Glycine	Methionyl-Glycine is a dipeptide composed of methionine and glycine. It is an incomplete breakdown product of protein digestion or protein catabolism. Some dipeptides are known to have physiological or cell-signaling effects although most are simply short	http://www.hmdb.ca/metabolites/HMDB28973	|Endogenous|
9.05_189.0701m/z	HMDB28847	C7H14N2O3S	4.3	89.3	189.07	9.05	0.0051	-2.12	Glycyl-Methionine	Glycyl-Methionine is a dipeptide composed of glycine and methionine. It is an incomplete breakdown product of protein digestion or protein catabolism. Some dipeptides are known to have physiological or cell-signaling effects although most are simply short	http://www.hmdb.ca/metabolites/HMDB28847	|Endogenous|
13.13_203.0231m/z	HMDB12208	C6H11N2O6P	6.4	91.7	203.02	13.13	0.0068	5.14	D-Erythro-imidazole-glycerol-phosphate	D-Erythro-imidazole-glycerol-phosphate is an intermediate in Histidine metabolism. It is a substrate for imidazoleglycerol-phosphate dehydratase (hisB) and can be generated from Phosphoribulosyl-formimino-AICAR-phosphate then it is converted to Imidazole-	http://www.hmdb.ca/metabolites/HMDB12208	|Endogenous|
10.79_253.1779m/z	HMDB41947	C11H24N3O2+	7.9	87.3	253.18	10.79	0.00069	Infinity	N1,N8-Diacetylspermidine	N1,n8-diacetylspermidine belongs to the family of Dialkylamines. These are organic compounds containing a dialkylamine group.	http://www.hmdb.ca/metabolites/HMDB41947	|Endogenous|
5.40_295.1298m/z	HMDB00594	C14H18N2O5	3.1	91.2	295.13	5.4	0.024	2.92	Glutamylphenylalanine	Glutamylphenylalanine is a gamma-glutamyl derivative. It is probably formed by transpeptidation between glutathione and the corresponding amino acid, catalyzed by gamma-glutamyl transpeptidase (PMID 237763). It can be detected in urine of patients with ph	http://www.hmdb.ca/metabolites/HMDB00594	|Endogenous|
5.40_295.1298m/z	HMDB29106	C14H18N2O5	3.1	91.2	295.13	5.4	0.024	2.92	Tyrosyl-Hydroxyproline	Tyrosyl-Hydroxyproline is a dipeptide composed of tyrosine and hydroxyproline. It is an incomplete breakdown product of protein digestion or protein catabolism. Some dipeptides are known to have physiological or cell-signaling effects although most are si	http://www.hmdb.ca/metabolites/HMDB29106	|Endogenous|
18.61_171.1382m/z	HMDB02203	C10H20O3	1.3	92.6	171.14	18.61	0.00029	-3.86	3-Hydroxycapric acid	3-hydroxycapric acid is a normally occurring carboxylic acid in human blood plasma. Medium- and long-chain 3-hydroxymonocarboxylic acids represent intermediates in the beta-oxidation of fatty acids. They accumulate in the plasma of patients with an inheri	http://www.hmdb.ca/metabolites/HMDB02203	|Endogenous|
18.61_171.1382m/z	HMDB10725	C10H20O3	1.3	92.6	171.14	18.61	0.00029	-3.86	(R)-3-Hydroxydecanoic acid	In humans fatty acids are predominantly formed in the liver and adipose tissue, and mammary glands during lactation.(R)-3-Hydroxydecanoic acid is an intermediate in fatty acid biosynthesis. Specifically,(R)-3-Hydroxydecanoic acid is converted from 3-Oxode	http://www.hmdb.ca/metabolites/HMDB10725	|Endogenous|
23.92_112.0860m/z	HMDB00870	C5H9N3	-7.9	96.4	112.09	23.92	2.2e-05	-5.81	Histamine	Histamine is an amine derived by enzymatic decarboxylation of histidine. It is a powerful stimulant of gastric secretion, a constrictor of bronchial smooth muscle, a vasodilator, and also a centrally acting neurotransmitter.	http://www.hmdb.ca/metabolites/HMDB00870	|Endogenous|
13.13_203.0231m/z	HMDB12236	C6H9N2O5P	6.9	91.9	203.02	13.13	0.0068	5.14	Imidazole acetol-phosphate	Imidazole acetol-phosphate is involved in the histidine biosynthesis I pathway. Imidazole acetol-phosphate is created by the breakdown of D-erythro-imidazole-glycerol-phosphate into imidazole acetol-phosphate and H2O. Imidazoleglycerol-phosphate dehydrata	http://www.hmdb.ca/metabolites/HMDB12236	|Endogenous|
12.09_270.3167m/z	HMDB01485	C8H18	5.1	96.4	270.32	12.09	0.0044	Infinity	Octane	One of the isomers, 2,2,4-trimethylpentane or isooctane, is of major importance, as it has been selected as the 100 point on the octane rating scale, with n-heptane as the zero point. Octane ratings are ratings used to represent the anti-knock performance	http://www.hmdb.ca/metabolites/HMDB01485	|Endogenous|
12.35_468.3078m/z	HMDB12517	C25H40O4	-1.6	83.9	468.31	12.35	0.0015	-12.71	11'-Carboxy-gamma-chromanol	11'-Carboxy-gamma-tocopherol is a dehydrogenation carboxylate product of 11'-hydroxy-r-tocopherol by an unidentified microsomal enzyme(s) probably via an aldehyde intermediate. r-Tocopherol provides different antioxidant activities in food and in-vitro st	http://www.hmdb.ca/metabolites/HMDB12517	|Endogenous|
12.81_494.3232m/z	HMDB13279	C11H21NO3	7.3	94.4	494.32	12.81	0.00087	-35.23	N-Nonanoylglycine	N-Nonanoylglycine is an acylglycine with C-9 fatty acid group as the acyl moiety. Acylglycines 1 possess a common amidoacetic acid moiety and are normally minor metabolites of fatty acids. Elevated levels of certain acylglycines appear in the urine and bl	http://www.hmdb.ca/metabolites/HMDB13279	|Endogenous|
14.49_522.3549m/z	HMDB13267	C12H23NO3	7.7	97.8	522.35	14.49	0.0042	-4.76	N-Decanoylglycine	N-Decanoylglycine is an acylglycine with C-10 fatty acid group as the acyl moiety. Acylglycines 1 possess a common amidoacetic acid moiety and are normally minor metabolites of fatty acids. Elevated levels of certain acylglycines appear in the urine and b	http://www.hmdb.ca/metabolites/HMDB13267	|Endogenous|
4.71_263.1981m/z	HMDB00557	C6H13NO2	6.1	98.5	263.2	4.71	1.8e-05	3.68	L-Alloisoleucine	L-alloisoleucine is a branched chain amino acid and is a stereo-isomer of L-isoleucine. It is a common constituent of human plasma (albeit at low levels). L-alloisoleucine is produced as a byproduct of isoleucine transamination. L-Isoleucine is one of the	http://www.hmdb.ca/metabolites/HMDB00557	|Endogenous|
4.71_263.1981m/z	HMDB01645	C6H13NO2	6.1	98.5	263.2	4.71	1.8e-05	3.68	L-Norleucine	L-Norleucine is an unnatural amino acid that is used experimentally to study protein structure and function. It is structurally similar to methionine, however it does not contain sulfur. Aminocaproic acid works as an antifibrinolytic. It is a derivative o	http://www.hmdb.ca/metabolites/HMDB01645	|Endogenous|
4.71_263.1981m/z	HMDB03640	C6H13NO2	6.1	98.5	263.2	4.71	1.8e-05	3.68	Beta-Leucine	Beta-leucine is a metabolite that is in the middle of a controversy over its presence in the human body. While there are reports that claim it as a human metabolite, there are others that deny its existence. Two examples:. Circulating levels of beta-leuci	http://www.hmdb.ca/metabolites/HMDB03640	|Endogenous|
4.71_263.1981m/z	HMDB13773	C6H13NO2	6.1	98.5	263.2	4.71	1.8e-05	3.68	D-Leucine	An essential branched-chain amino acid important for hemoglobin formation. [PubChem]; Branched chain amino acids (BCAA) are essential amino acids whose carbon structure is marked by a branch point. These three amino acids are critical to human life and ar	http://www.hmdb.ca/metabolites/HMDB13773	|Endogenous|
5.40_295.1298m/z	HMDB28875	C14H18N2O5	3.1	91.2	295.13	5.4	0.024	2.92	Hydroxyprolyl-Tyrosine	Hydroxyprolyl-Tyrosine is a dipeptide composed of hydroxyproline and tyrosine. It is an incomplete breakdown product of protein digestion or protein catabolism. Some dipeptides are known to have physiological or cell-signaling effects although most are si	http://www.hmdb.ca/metabolites/HMDB28875	|Endogenous|
5.40_295.1298m/z	HMDB11716	C12H15NO5	3.6	93.6	295.13	5.4	0.024	2.92	N-Acetylvanilalanine	N-acetylvanilalanine is a catecholamine metabolite. Its accumulation is indicative of aromatic L-amino acid decarboxylase deficiency (PMID: 16288991).	http://www.hmdb.ca/metabolites/HMDB11716	|Endogenous|
8.55_266.1035m/z	HMDB03950	C11H15N4O5+	9.2	92.1	266.1	8.55	0.018	2.19	7-Methylinosine	7-Methylinosine is an endogenous methylated nucleoside found in human fluids; methylated purine bases are present in higher amounts in tumor-bearing patients compared to healthy controls.DNA hypermethylation is a common finding in malignant cells and has	http://www.hmdb.ca/metabolites/HMDB03950	|Endogenous|
8.55_266.1035m/z	HMDB28884	C11H15N4O5-	9.2	92.1	266.1	8.55	0.018	2.19	Histidinyl-Glutamate	Histidinyl-Glutamate is a dipeptide composed of histidine and glutamate. It is an incomplete breakdown product of protein digestion or protein catabolism. Some dipeptides are known to have physiological or cell-signaling effects although most are simply s	http://www.hmdb.ca/metabolites/HMDB28884	|Endogenous|
8.55_266.1035m/z	HMDB28821	C11H15N4O5-	9.2	92.1	266.1	8.55	0.018	2.19	Glutamyl-Histidine	Glutamyl-Histidine is a dipeptide composed of glutamate and histidine. It is an incomplete breakdown product of protein digestion or protein catabolism. Some dipeptides are known to have physiological or cell-signaling effects although most are simply sho	http://www.hmdb.ca/metabolites/HMDB28821	|Endogenous|
6.64_122.0593m/z	HMDB04461	C7H7NO	-6.2	82	122.06	6.64	0.024	2.78	Benzamide	Benzamide is an intermediate in the Benzoate degradation via CoA ligation. Benzamides are a class of chemical compounds derived from Benzamid, the carbonic acid amide of benzoic acid. In psychiatry some substituted benzamides are therapeutically used as n	http://www.hmdb.ca/metabolites/HMDB04461	|Endogenous|
1.88_685.0448m/z	HMDB11671	C15H22N5O16P3	2.6	86.4	685.04	1.88	0.043	2	ADP-ribose 1"-2" cyclic phosphate	ADP-ribose 1"-2" cyclic phosphate is a cyclic phosphate nucleotide that arises from tRNA processing. In eukaryotic cells, pre-tRNAs spliced by a pathway that produces a 3',5'-phosphodiester, 2'-phosphomonoester linkage contain a 2'-phosphate group adjacen	http://www.hmdb.ca/metabolites/HMDB11671	|Endogenous|
4.24_211.1087m/z	HMDB11172	C10H18N2O5	4	91.4	211.11	4.24	4e-06	2.19	L-gamma-glutamyl-L-valine	L-gamma-glutamyl-l-valine is a proteolytic breakdown product of larger proteins. It belongs to the family of N-acyl-alpha Amino Acids and Derivatives. These are compounds containing an alpha amino acid which bears an acyl group at his terminal nitrogen at	http://www.hmdb.ca/metabolites/HMDB11172	|Endogenous|
4.24_211.1087m/z	HMDB28925	C10H18N2O5	4	91.4	211.11	4.24	4e-06	2.19	Leucyl-Aspartate	Leucyl-Aspartate is a dipeptide composed of leucine and aspartate. It is an incomplete breakdown product of protein digestion or protein catabolism. Some dipeptides are known to have physiological or cell-signaling effects although most are simply short-l	http://www.hmdb.ca/metabolites/HMDB28925	|Endogenous|
4.24_211.1087m/z	HMDB28757	C10H18N2O5	4	91.4	211.11	4.24	4e-06	2.19	Aspartyl-Leucine	Aspartyl-Leucine is a dipeptide composed of aspartate and leucine. It is an incomplete breakdown product of protein digestion or protein catabolism. Some dipeptides are known to have physiological or cell-signaling effects although most are simply short-l	http://www.hmdb.ca/metabolites/HMDB28757	|Endogenous|
4.24_211.1087m/z	HMDB11166	C10H18N2O5	4	91.4	211.11	4.24	4e-06	2.19	L-beta-aspartyl-L-leucine	L-beta-aspartyl-l-leucine is a proteolytic breakdown product of larger proteins. It belongs to the family of N-acyl-alpha Amino Acids and Derivatives. These are compounds containing an alpha amino acid which bears an acyl group at his terminal nitrogen at	http://www.hmdb.ca/metabolites/HMDB11166	|Endogenous|
4.24_211.1087m/z	HMDB28756	C10H18N2O5	4	91.4	211.11	4.24	4e-06	2.19	Aspartyl-Isoleucine	Aspartyl-Isoleucine is a dipeptide composed of aspartate and isoleucine. It is an incomplete breakdown product of protein digestion or protein catabolism. Some dipeptides are known to have physiological or cell-signaling effects although most are simply s	http://www.hmdb.ca/metabolites/HMDB28756	|Endogenous|
4.24_211.1087m/z	HMDB28903	C10H18N2O5	4	91.4	211.11	4.24	4e-06	2.19	Isoleucyl-Aspartate	Isoleucyl-Aspartate is a dipeptide composed of isoleucine and aspartate. It is an incomplete breakdown product of protein digestion or protein catabolism. Some dipeptides are known to have physiological or cell-signaling effects although most are simply s	http://www.hmdb.ca/metabolites/HMDB28903	|Endogenous|
4.24_211.1087m/z	HMDB29018	C10H16N2O4	4.3	91.7	211.11	4.24	4e-06	2.19	Prolyl-Hydroxyproline	Prolyl-Hydroxyproline is a dipeptide composed of proline and hydroxyproline. It is an incomplete breakdown product of protein digestion or protein catabolism. Some dipeptides are known to have physiological or cell-signaling effects although most are simp	http://www.hmdb.ca/metabolites/HMDB29018	|Endogenous|
4.24_211.1087m/z	HMDB06695	C10H16N2O4	4.3	91.7	211.11	4.24	4e-06	2.19	Prolylhydroxyproline	Prolylhydroxyproline is a dipeptide. Prolylhydroxyproline is a marker of bone collagen degradation, showing high sensitivity for the diagnosis of osteoporosis. Prolylhydroxyproline has been suggested as a possible alternative to hydroxyproline determinati	http://www.hmdb.ca/metabolites/HMDB06695	|Endogenous|
4.24_211.1087m/z	HMDB28871	C10H16N2O4	4.3	91.7	211.11	4.24	4e-06	2.19	Hydroxyprolyl-Proline	Hydroxyprolyl-Proline is a dipeptide composed of hydroxyproline and proline. It is an incomplete breakdown product of protein digestion or protein catabolism. Some dipeptides are known to have physiological or cell-signaling effects although most are simp	http://www.hmdb.ca/metabolites/HMDB28871	|Endogenous|
4.24_211.1087m/z	HMDB00239	C8H11NO3	5.8	94.4	211.11	4.24	4e-06	2.19	Pyridoxine	The 4-methanol form of vitamin B6 which is converted to pyridoxal phosphate which is a coenzyme for synthesis of amino acids, neurotransmitters (serotonin, norepinephrine), sphingolipids, aminolevulinic acid. Although pyridoxine and Vitamin B6 are still f	http://www.hmdb.ca/metabolites/HMDB00239	|Endogenous|
4.24_211.1087m/z	HMDB04817	C8H11NO3	5.8	94.4	211.11	4.24	4e-06	2.19	5-Hydroxydopamine	5-Hydroxydopamine is a naturally occurring amine in human urine. 5-Hydroxydopamine concentration in urine of DOPA treated Parkinson's patients was significantly higher than inpatients not treated or normal controls. (PMID 8255370).	http://www.hmdb.ca/metabolites/HMDB04817	|Endogenous|
4.54_263.1981m/z	HMDB00557	C6H13NO2	6.1	95.3	263.2	4.54	0.00036	3.15	L-Alloisoleucine	L-alloisoleucine is a branched chain amino acid and is a stereo-isomer of L-isoleucine. It is a common constituent of human plasma (albeit at low levels). L-alloisoleucine is produced as a byproduct of isoleucine transamination. L-Isoleucine is one of the	http://www.hmdb.ca/metabolites/HMDB00557	|Endogenous|
4.54_263.1981m/z	HMDB01645	C6H13NO2	6.1	95.3	263.2	4.54	0.00036	3.15	L-Norleucine	L-Norleucine is an unnatural amino acid that is used experimentally to study protein structure and function. It is structurally similar to methionine, however it does not contain sulfur. Aminocaproic acid works as an antifibrinolytic. It is a derivative o	http://www.hmdb.ca/metabolites/HMDB01645	|Endogenous|
4.54_263.1981m/z	HMDB03640	C6H13NO2	6.1	95.3	263.2	4.54	0.00036	3.15	Beta-Leucine	Beta-leucine is a metabolite that is in the middle of a controversy over its presence in the human body. While there are reports that claim it as a human metabolite, there are others that deny its existence. Two examples:. Circulating levels of beta-leuci	http://www.hmdb.ca/metabolites/HMDB03640	|Endogenous|
4.54_263.1981m/z	HMDB13773	C6H13NO2	6.1	95.3	263.2	4.54	0.00036	3.15	D-Leucine	An essential branched-chain amino acid important for hemoglobin formation. [PubChem]; Branched chain amino acids (BCAA) are essential amino acids whose carbon structure is marked by a branch point. These three amino acids are critical to human life and ar	http://www.hmdb.ca/metabolites/HMDB13773	|Endogenous|
7.98_229.1423m/z	HMDB03843	C6H10O2	-4.9	96	229.14	7.98	0.01	2.55	Gamma-Caprolactone	4-hydroxy-Hexanoic acid gamma-lactone is occasionally found as a volatile component of human urine. 4-hydroxy-Hexanoic acid gamma-lactone has been found in the polar fraction of human blood. Biological fluids such as blood and urine have been shown to con	http://www.hmdb.ca/metabolites/HMDB03843	|Endogenous|
8.60_293.1489m/z	HMDB11687	C15H20N2O4	-2.3	83.5	293.15	8.6	0.032	-2.04	Phenylbutyrylglutamine	Phenylbutyrylglutamine has been identified as a new metabolite of phenylbutyrate in human plasma and urine. Phenylbutyrate is used in humans for treating inborn errors of ureagenesis, certain forms of cancer, cystic fibrosis and thalassemia. After adminis	http://www.hmdb.ca/metabolites/HMDB11687	|Endogenous|
8.93_234.0593m/z	HMDB05971	C6H8O7	-7.9	94.5	234.06	8.93	0.016	-2.01	Diketogulonic acid	Diketogulonic acid (DKG) is a metabolite of the degradation of vitamin C, the nonenzymatic hydrolysis-product of dehydroascorbate. Dehydroascorbate can be reduced back to ascorbate or hydrolyzed to DKG; the latter reaction is irreversible and DKG is devoi	http://www.hmdb.ca/metabolites/HMDB05971	|Endogenous|
8.93_234.0593m/z	HMDB01874	C6H8O7	-7.9	94.5	234.06	8.93	0.016	-2.01	D-threo-Isocitric acid	Threo-Isocitric acid is the substrate of isocitrate dehydrogenase (IDH), a NADP-dependent IDH that occurs in 2 structurally distinct forms: mitochondrial (OMIM 147650) and soluble (also called supernatant or cytoplasmic, OMIM 147700).	http://www.hmdb.ca/metabolites/HMDB01874	|Endogenous|
8.93_234.0593m/z	HMDB41862	C6H8O7	-7.9	94.5	234.06	8.93	0.016	-2.01	D-Glucaro-1,4-lactone	D-glucaro-1,4-lactone belongs to the family of Pentoses. These are monosaccharides in which the carbohydrate moiety contains five carbon atoms.	http://www.hmdb.ca/metabolites/HMDB41862	|Endogenous|
8.93_234.0593m/z	HMDB00193	C6H8O7	-7.9	94.5	234.06	8.93	0.016	-2.01	Isocitric acid	The citrate oxidation to isocitrate is catalyzed by the enzyme aconitase. Human prostatic secretion is remarkably rich in citric acid and low aconitase activity will therefore play a significant role in enabling accumulation of high citrate levels (PubMed	http://www.hmdb.ca/metabolites/HMDB00193	|Endogenous|
8.93_234.0593m/z	HMDB06511	C6H8O7	-7.9	94.5	234.06	8.93	0.016	-2.01	2,3-Diketo-L-gulonate	2,3-Diketo-L-gulonate is an intermediate in Ascorbate and aldarate metabolism. 2,3-Diketo-L-gulonate is produced from Dehydroascorbate and then converted to L-Xylonate via the enzyme Lyases (EC 4.1.1.-).	http://www.hmdb.ca/metabolites/HMDB06511	|Endogenous|
8.93_203.0831m/z	HMDB28853	C11H14N2O4	6.9	91.6	203.08	8.93	0.00036	-2.77	Glycyl-Tyrosine	Glycyl-Tyrosine is a dipeptide composed of glycine and tyrosine. It is an incomplete breakdown product of protein digestion or protein catabolism. Some dipeptides are known to have physiological or cell-signaling effects although most are simply short-liv	http://www.hmdb.ca/metabolites/HMDB28853	|Endogenous|
8.93_203.0831m/z	HMDB29105	C11H14N2O4	6.9	91.6	203.08	8.93	0.00036	-2.77	Tyrosyl-Glycine	Tyrosyl-Glycine is a dipeptide composed of tyrosine and glycine. It is an incomplete breakdown product of protein digestion or protein catabolism. Some dipeptides are known to have physiological or cell-signaling effects although most are simply short-liv	http://www.hmdb.ca/metabolites/HMDB29105	|Endogenous|
8.93_203.0831m/z	HMDB00472	C11H12N2O3	7.5	91.8	203.08	8.93	0.00036	-2.77	5-Hydroxy-L-tryptophan	5-Hydroxy-L-tryptophan is an aromatic amino acid naturally produced by the body from the essential amino acid l-tryptophan. 5-Hydroxy-L-tryptophan is the immediate precursor of the neurotransmitter serotonin. The conversion to serotonin is catalyzed by th	http://www.hmdb.ca/metabolites/HMDB00472	|Endogenous|
8.93_203.0831m/z	HMDB28788	C8H16N2O3S	-7.9	90	203.08	8.93	0.00036	-2.77	Cysteinyl-Valine	Cysteinyl-Valine is a dipeptide composed of cysteine and valine. It is an incomplete breakdown product of protein digestion or protein catabolism. Some dipeptides are known to have physiological or cell-signaling effects although most are simply short-liv	http://www.hmdb.ca/metabolites/HMDB28788	|Endogenous|
8.93_203.0831m/z	HMDB29124	C8H16N2O3S	-7.9	90	203.08	8.93	0.00036	-2.77	Valyl-Cysteine	Valyl-Cysteine is a dipeptide composed of valine and cysteine. It is an incomplete breakdown product of protein digestion or protein catabolism. Some dipeptides are known to have physiological or cell-signaling effects although most are simply short-lived	http://www.hmdb.ca/metabolites/HMDB29124	|Endogenous|
8.93_203.0831m/z	HMDB28693	C8H16N2O3S	-7.9	90	203.08	8.93	0.00036	-2.77	Alanyl-Methionine	Alanyl-Methionine is a dipeptide composed of alanine and methionine. It is an incomplete breakdown product of protein digestion or protein catabolism. Some dipeptides are known to have physiological or cell-signaling effects although most are simply short	http://www.hmdb.ca/metabolites/HMDB28693	|Endogenous|
8.93_203.0831m/z	HMDB28966	C8H16N2O3S	-7.9	90	203.08	8.93	0.00036	-2.77	Methionyl-Alanine	Methionyl-Alanine is a dipeptide composed of methionine and alanine. It is an incomplete breakdown product of protein digestion or protein catabolism. Some dipeptides are known to have physiological or cell-signaling effects although most are simply short	http://www.hmdb.ca/metabolites/HMDB28966	|Endogenous|
8.93_203.0831m/z	HMDB13825	C11H16O	-0.8	92.9	203.08	8.93	0.00036	-2.77	4-(1,1,3,3-Tetramethylbutyl)-phenol	4-(1,1,3,3-Tetramethylbutyl)-phenol (CAS 140-66-9) is manufactured by catalytic reaction of Phenol with Diisobutylene. 4-(1,1,3,3-tetramethylbutyl)-phenol is biodegradable, in the surface layer of natural waters 30% of OP can be degraded within one day. 4	http://www.hmdb.ca/metabolites/HMDB13825	|Endogenous|
8.55_425.2625m/z	HMDB00832	C10H19NO3	0.8	88.7	425.26	8.55	0.0035	2.23	Capryloylglycine	Capryloylglycine is an acyl glycine. Acyl glycines are normally minor metabolites of fatty acids. However, the excretion of certain acyl glycines is increased in several inborn errors of metabolism. In certain cases the measurement of these metabolites in	http://www.hmdb.ca/metabolites/HMDB00832	|Endogenous|
6.13_243.1352m/z	HMDB13835	C16H22O4	-9.9	88	243.14	6.13	0.013	8.14	Diisobutyl phthalate	DIBP is an odorless plasticizer and has excellent heat and light stability. It is the lowest cost plasticizer for cellulose nitrate. DIBP has lower density and freezing point than DBP (dibutyl phthalate, CAS No.: 84-74-2). It has similar properties as dib	http://www.hmdb.ca/metabolites/HMDB13835	|Endogenous|
6.13_243.1352m/z	HMDB01518	C16H22O4	-9.9	88	243.14	6.13	0.013	8.14	Alpha-CEHC	2,5,7,8-tetramethyl-2-(2'-carboxyethyl)-6-hydroxychroman (alpha-CEHC) has been identified as a major water-soluble metabolite of vitamin E, which circulates in the blood and is excreted with the urine. (PMID 12420750).	http://www.hmdb.ca/metabolites/HMDB01518	|Endogenous|
6.13_243.1352m/z	HMDB13248	C16H22O4	-9.9	88	243.14	6.13	0.013	8.14	Monoethylhexyl phthalic acid	Monoethylhexyl phthalic acid (MEHP) is an active metabolite of Bis(2-ethylhexyl)phthalate (DEHP). DEHP measured from the blood of pregnant women have been significantly associated with the decreased penis width, shorter anogenital distance, and the incomp	http://www.hmdb.ca/metabolites/HMDB13248	|Endogenous|
6.13_243.1352m/z	HMDB11170	C11H20N2O5	4.9	92	243.14	6.13	0.013	8.14	L-gamma-glutamyl-L-isoleucine	L-gamma-glutamyl-l-isoleucine is a proteolytic breakdown product of larger proteins. It belongs to the family of N-acyl-alpha Amino Acids and Derivatives. These are compounds containing an alpha amino acid which bears an acyl group at his terminal nitroge	http://www.hmdb.ca/metabolites/HMDB11170	|Endogenous|
6.13_243.1352m/z	HMDB11171	C11H20N2O5	4.9	92	243.14	6.13	0.013	8.14	L-gamma-glutamyl-L-leucine	L-gamma-glutamyl-l-leucine is a proteolytic breakdown product of larger proteins. It belongs to the family of N-acyl-alpha Amino Acids and Derivatives. These are compounds containing an alpha amino acid which bears an acyl group at his terminal nitrogen a	http://www.hmdb.ca/metabolites/HMDB11171	|Endogenous|
6.13_243.1352m/z	HMDB13817	C14H20O2	-1.5	90.4	243.14	6.13	0.013	8.14	2,6-Di-tert-butylbenzoquinone	2,6-di-tert-butylbenzoquinone is not used for fragrances or flavors.	http://www.hmdb.ca/metabolites/HMDB13817	|Endogenous|
6.20_351.1551m/z	HMDB12799	C18H26O4	2.8	87.8	351.16	6.2	0.0092	Infinity	5'-Carboxy-gamma-chromanol	5'-Carboxy-gamma-tocopherol is a dehydrogenation carboxylate product of 5'-hydroxy-r-tocopherol by an unidentified microsomal enzyme(s) probably via an aldehyde intermediate. r-Tocopherol provides different antioxidant activities in food and in-vitro stud	http://www.hmdb.ca/metabolites/HMDB12799	|Endogenous|
6.20_351.1551m/z	HMDB01955	C10H12O2	-4.7	96.4	351.16	6.2	0.0092	Infinity	3-Phenylbutyric acid	Phenylbutyric acid is a metabolite occasionally isolated from biological samples (PMID 11043786; 6511847), and it is speculated that this is due to a pitfall in quantitative urinary organic acid analysis originated in the irreproducible adsorption to glas	http://www.hmdb.ca/metabolites/HMDB01955	|Endogenous|
6.20_351.1551m/z	HMDB00329	C10H12O2	-4.7	96.4	351.16	6.2	0.0092	Infinity	2-Phenylbutyric acid	2-Phenylbutyric acid is used as an anticholesteremic.	http://www.hmdb.ca/metabolites/HMDB00329	|Endogenous|
6.12_162.0411m/z	HMDB00704	C6H5N5O2	0.1	93.2	162.04	6.12	2.9e-11	2.91	Isoxanthopterin	Isoxanthopterin is a pteridine normally present in plasma, urine, and other bodily fluids also vary from normal concentrations in some disease states and also have diagnostic value. Pteridines' urinary concentrations seem to vary independently from each o	http://www.hmdb.ca/metabolites/HMDB00704	|Endogenous|
6.12_162.0411m/z	HMDB02273	C5H7NO5-2	8.4	95.7	162.04	6.12	2.9e-11	2.91	4-Hydroxy-L-glutamic acid	4-Hydroxy-L-glutamic acid is an intermediate in the metabolism of gamma-hydroxyglutamic acid. Specifically 4-Hydroxy-L-glutamic acid combines with 2-oxoglutarate to produce 4-hydroxy-2-oxoglutarate and glutamate. The reaction can be described as: 4-Hydrox	http://www.hmdb.ca/metabolites/HMDB02273	|Endogenous|
6.12_162.0411m/z	HMDB02467	C5H7NO5	8.4	95.7	162.04	6.12	2.9e-11	2.91	A-Ketoglutaric acid oxime	Alpha-Ketoglutaric acid oxime is an organic acid being described in human urine in some cases of maple syrup urine disease. (PMID: 7438430, 699273).	http://www.hmdb.ca/metabolites/HMDB02467	|Endogenous|
5.86_162.0411m/z	HMDB00704	C6H5N5O2	0.1	93.4	162.04	5.86	8.6e-10	3.01	Isoxanthopterin	Isoxanthopterin is a pteridine normally present in plasma, urine, and other bodily fluids also vary from normal concentrations in some disease states and also have diagnostic value. Pteridines' urinary concentrations seem to vary independently from each o	http://www.hmdb.ca/metabolites/HMDB00704	|Endogenous|
5.86_162.0411m/z	HMDB02273	C5H7NO5-2	8.4	95.9	162.04	5.86	8.6e-10	3.01	4-Hydroxy-L-glutamic acid	4-Hydroxy-L-glutamic acid is an intermediate in the metabolism of gamma-hydroxyglutamic acid. Specifically 4-Hydroxy-L-glutamic acid combines with 2-oxoglutarate to produce 4-hydroxy-2-oxoglutarate and glutamate. The reaction can be described as: 4-Hydrox	http://www.hmdb.ca/metabolites/HMDB02273	|Endogenous|
5.86_162.0411m/z	HMDB02467	C5H7NO5	8.4	95.9	162.04	5.86	8.6e-10	3.01	A-Ketoglutaric acid oxime	Alpha-Ketoglutaric acid oxime is an organic acid being described in human urine in some cases of maple syrup urine disease. (PMID: 7438430, 699273).	http://www.hmdb.ca/metabolites/HMDB02467	|Endogenous|
6.64_122.0593m/z	HMDB00459	C7H11NO3	-4.8	81.8	122.06	6.64	0.024	2.78	3-Methylcrotonylglycine	3-Methylcrotonylglycine is an acyl glycine. Acyl glycines are normally minor metabolites of fatty acids. However, the excretion of certain acyl glycines is increased in several inborn errors of metabolism. In certain cases the measurement of these metabol	http://www.hmdb.ca/metabolites/HMDB00459	|Endogenous|
6.64_122.0593m/z	HMDB00959	C7H11NO3	-4.8	81.8	122.06	6.64	0.024	2.78	Tiglylglycine	Tiglylglycine is an acyl glycine. Acyl glycines are normally minor metabolites of fatty acids. However, the excretion of certain acyl glycines is increased in several inborn errors of metabolism. In certain cases the measurement of these metabolites in bo	http://www.hmdb.ca/metabolites/HMDB00959	|Endogenous|
6.64_122.0593m/z	HMDB12153	C7H9NO2	-5.4	81.9	122.06	6.64	0.024	2.78	3,4-Dihydroxybenzylamine	3,4-Dihydroxybenzylamine is an alternative substrates for dopamine that is a member of the catecholamine family in the brain, and is a precursor to epinephrine and norepinephrine. Catecholamines contain a catechol group, and are derived from the amino aci	http://www.hmdb.ca/metabolites/HMDB12153	|Endogenous|
7.19_352.1331m/z	HMDB12322	C10H8O	7.8	89.5	352.13	7.19	0.0061	30.88	2-Naphthol	2-Naphthol is a colorless crystalline solid and an isomer of 1-naphthol, differing by the location of the hydroxyl group on naphthalene. The naphthols are naphthalene homologues of phenol, with the hydroxyl group being more reactive than in the phenols. 2	http://www.hmdb.ca/metabolites/HMDB12322	|Endogenous|
7.19_352.1331m/z	HMDB06215	C10H8O	7.8	89.5	352.13	7.19	0.0061	30.88	Naphthalene epoxide	Naphthalene epoxide is an epoxide derivative of naphthalene. The toxicity of naphthalene has to do with the Phase I metabolism of this compound by cytochrome P450 monooxygenases. Deactivation of naphthalene involves epoxidation followed by glutathione con	http://www.hmdb.ca/metabolites/HMDB06215	|Endogenous|
6.32_213.0747m/z	HMDB00913	C10H12O5	-5.1	92.7	213.07	6.32	7.9e-06	-9.54	Vanillactic acid	Vanillactic acid is an acidic catecholamine metabolite present in normal human urine (PMID 7524950), in normal human CSF (PMID 7914240), and increased in the CSF of newborns with neonatal epileptic encephalopathy mimicking aromatic L-amino acid decarboxyl	http://www.hmdb.ca/metabolites/HMDB00913	|Endogenous|
6.32_213.0747m/z	HMDB00325	C8H14O5	7	94.6	213.07	6.32	7.9e-06	-9.54	3-Hydroxysuberic acid	3-Hydroxysuberic acid is a metabolite derived from the w-oxidation of 3-hydroxy fatty acids and the subsequent beta-oxidation of longer-chain 3-hydroxy dicarboxylic acids (PMID 2001377). It has been found increased in ketoaciduria (PMID 1591279).	http://www.hmdb.ca/metabolites/HMDB00325	|Endogenous|
6.32_213.0747m/z	HMDB03416	C6H14N4O2	-0.9	96	213.07	6.32	7.9e-06	-9.54	D-Arginine	D-Arginine is an essential amino acid that is physiologically active in the L-form.	http://www.hmdb.ca/metabolites/HMDB03416	|Endogenous|
6.45_211.1455m/z	HMDB28915	C11H20N2O3	6.1	91.2	211.15	6.45	0.00025	2.88	Isoleucyl-Proline	Isoleucyl-Proline is a dipeptide composed of isoleucine and proline. It is an incomplete breakdown product of protein digestion or protein catabolism. Some dipeptides are known to have physiological or cell-signaling effects although most are simply short	http://www.hmdb.ca/metabolites/HMDB28915	|Endogenous|
6.45_211.1455m/z	HMDB11175	C11H20N2O3	6.1	91.2	211.15	6.45	0.00025	2.88	L-leucyl-L-proline	L-leucyl-l-proline is a proteolytic breakdown product of larger proteins. It belongs to the family of Peptides. These are compounds containing an amide derived from two or more amino carboxylic acid molecules (the same or different) by formation of a cova	http://www.hmdb.ca/metabolites/HMDB11175	|Endogenous|
6.45_211.1455m/z	HMDB28937	C11H20N2O3	6.1	91.2	211.15	6.45	0.00025	2.88	Leucyl-Proline	Leucyl-Proline is a dipeptide composed of leucine and proline. It is an incomplete breakdown product of protein digestion or protein catabolism. Some dipeptides are known to have physiological or cell-signaling effects although most are simply short-lived	http://www.hmdb.ca/metabolites/HMDB28937	|Endogenous|
6.45_211.1455m/z	HMDB11174	C11H20N2O3	6.1	91.2	211.15	6.45	0.00025	2.88	L-isoleucyl-L-proline	L-isoleucyl-l-proline is a proteolytic breakdown product of larger proteins. It belongs to the family of Peptides. These are compounds containing an amide derived from two or more amino carboxylic acid molecules (the same or different) by formation of a c	http://www.hmdb.ca/metabolites/HMDB11174	|Endogenous|
11.22_341.1930m/z	HMDB41944	C15H23N3O2	-6.33213	83.5492	341.193	11.222	0.000189909	37.7442	N-Acetylprocainamide	N-Acetylprocainamide (NAPA or acecainide) is the N-acetylated metabolite of procainamide. It is a Class III antiarrhythmic agent, whereas procainamide is a Class Ia antiarrhythmic drug. It is only partially as active as procainamide; when checking levels	http://www.hmdb.ca/metabolites/HMDB41944	|Endogenous|
4.24_211.1087m/z	HMDB00216	C8H11NO3	5.79915	94.3528	211.109	4.2401	3.95054e-06	2.18843	Norepinephrine	Precursor of epinephrine that is secreted by the adrenal medulla and is a widespread central and autonomic neurotransmitter. Norepinephrine is the principal transmitter of most postganglionic sympathetic fibers and of the diffuse projection system in the	http://www.hmdb.ca/metabolites/HMDB00216	|Endogenous|
7.98_229.1423m/z	HMDB00453	C6H10O2	-4.89061	96.0169	229.142	7.97882	0.0104357	2.55159	Delta-Hexanolactone	D-Hexanolactone is the lactone of 5-hydroxy-Hexanoic acid. Lactones are internal esters that exist in equilibrium between their closed (lactone) and open (hydroxy acid) forms in an aqueous environment. The lactone/hydroxy acid ratio at equilibrium is pH-d	http://www.hmdb.ca/metabolites/HMDB00453	|Endogenous|
8.93_234.0593m/z	HMDB00094	C6H8O7	-7.87828	94.4776	234.059	8.93377	0.0156026	-2.01069	Citric acid	Citric acid (citrate) is a weak acid that is formed in the tricarboxylic acid cycle or that may be introduced with diet. The evaluation of plasma citric acid is scarcely used in the diagnosis of human diseases. On the contrary urinary citrate excretion is	http://www.hmdb.ca/metabolites/HMDB00094	|Endogenous|
8.55_425.2625m/z	HMDB13116	C10H19NO3	0.834966	88.7044	425.263	8.5493	0.00352094	2.23248	Valproylglycine	In humans, valproylglycine has been identified as a urinary metabolite of Valproic acid (Abbott and Anari 1999) along with VPA-glutamate conjugate.Valproic acid (VPA; 2-n-propylpentanoic acid) is widely used as a major drug in the treatment of epilepsy an	http://www.hmdb.ca/metabolites/HMDB13116	|Endogenous|
6.20_351.1551m/z	HMDB00543	C10H12O2	-4.71585	96.3783	351.155	6.2025	0.00923564	Infinity	Benzenebutanoic acid	Benzenebutanoic acid (also known as 4-phenylbutyrate, or 4-PBA) is the oral form of butyrate, which is known to be a transcriptional regulator. Sodium-4-PBA has been shown to induce fetal hemoglobin, and it has been used in clinical trials for sickle cell	http://www.hmdb.ca/metabolites/HMDB00543	|Endogenous|
7.19_352.1331m/z	HMDB12138	C10H8O	7.82113	89.532	352.133	7.19242	0.00610519	30.8797	1-Naphthol	1-naphthol (1N) is a metabolite of carbaryl and naphthalene that is an intermediate in Metabolism of xenobiotics by cytochrome P450. It is generated by spontaneous reaction from (1R,2S)-Naphthalene epoxide then is it converted to 1,4-Dihydroxynaphthalene.	http://www.hmdb.ca/metabolites/HMDB12138	|Endogenous|
9.14_335.2176m/z	HMDB04706	C18H32O4	-5.5	81.3	335.22	9.14	0.018	-2.72	8(R)-Hydroperoxylinoleic acid	8(R)-hydroperoxylinoleic acid (8(R)-EPODE) is an oxidized product of linoleic acid. Oxidized lipids such as 8(R)-HPODE can decrease cellular proteoglycan metabolism in endothelial monolayers and alter mRNA levels of major specific proteoglycans in a conce	http://www.hmdb.ca/metabolites/HMDB04706	|Endogenous|Food|
9.14_335.2176m/z	HMDB03871	C18H32O4	-5.5	81.3	335.22	9.14	0.018	-2.72	13-L-Hydroperoxylinoleic acid	13-L-Hydroperoxylinoleic acid (13(S)-HPODE) is one of the primary products of the major polyunsaturated fatty acids (linoleic acid and arachidonic acid) from the 15-1ipoxygenase pathway (EC: 1.13.11.31). 13(S)-HPODE is a rather unstable metabolite and is	http://www.hmdb.ca/metabolites/HMDB03871	|Endogenous|Food|
9.14_335.2176m/z	HMDB06940	C18H32O4	-5.5	81.3	335.22	9.14	0.018	-2.72	9(S)-HPODE	9(S)-HPODE is an intermediate in Linoleic acid metabolism(KEGG ID C14827). It is the second to last step in the synthesis of 9-oxoODE, and is converted from linoleate via the enzyme arachidonate 5-lipoxygenase [EC:1.13.11.34]. It is then converted to 9(S)	http://www.hmdb.ca/metabolites/HMDB06940	|Endogenous|Food|
9.52_283.1163m/z	HMDB12882	C6H10O3	4.1	97.1	283.12	9.52	0.019	2.04	Adipate semialdehyde	Adipate semialdehyde is the intermediate metabolite in the formation of caproic acid. Adipate semialdehyde is converted from .alpha.-ketopimelate catalyzed by the decarboxylase enzyme, and the aminotransferase enzyme catalyzes the conversion of adipate se	http://www.hmdb.ca/metabolites/HMDB12882	|Endogenous|Food|
9.52_283.1163m/z	HMDB00491	C6H10O3	4.1	97.1	283.12	9.52	0.019	2.04	3-Methyl-2-oxovaleric acid	3-Methyl-2-oxovaleric acid is a metabolite of isoleucine in man, animals and bacteria. It is the alpha-keto acid analogue of isoleucine. 3-Methyl-2-oxovaleric acid is produced from isoleucine by cytosolic branched chain aminotransferase 1 (EC:2.6.1.42), w	http://www.hmdb.ca/metabolites/HMDB00491	|Endogenous|Food|
9.52_283.1163m/z	HMDB00408	C6H10O3	4.1	97.1	283.12	9.52	0.019	2.04	2-Methyl-3-ketovaleric acid	2-Methyl-3-ketovaleric acid is a metabolite of beta-leucine in the beta-keto pathway of leucine metabolism. 2-Methyl-3-ketovaleric acid is a known pathological metabolite and associated with propionic acidemia, especially during periods of ketoacidosis; a	http://www.hmdb.ca/metabolites/HMDB00408	|Endogenous|Food|
9.52_283.1163m/z	HMDB31218	C6H10O3	4.1	97.1	283.12	9.52	0.019	2.04	Ethyl 3-oxobutanoate	The organic compound ethyl acetoacetate (EAA) is the ethyl ester of acetoacetic acid. It is mainly used as a chemical intermediate in the production of a wide variety of compounds, such as amino acids, analgesics, antibiotics, antimalarial agents, antipyr	http://www.hmdb.ca/metabolites/HMDB31218	|Endogenous|Food|
9.52_283.1163m/z	HMDB00695	C6H10O3	4.1	97.1	283.12	9.52	0.019	2.04	Ketoleucine	Ketoleucine is a metabolite that accumulates in Maple Syrup Urine Disease (MSUD) and shown to compromise brain energy metabolism by blocking the respiratory chain; this is of relevance to the understanding of the pathophysiology of the neurological dysfun	http://www.hmdb.ca/metabolites/HMDB00695	|Endogenous|Food|
9.54_201.1127m/z	HMDB13227	C10H16O4	2.9	91.2	201.11	9.54	0.045	5	cis-5-Decenedioic acid	cis-5-Decenedioic acid is a mono-unsaturated dicarboxylic acid. The dicarboxylic acid can be grouped into two metabolic series: the cis-4 series as well as the cis-3 and cis-5 series. The metabolic precursor of cis-5 unsaturated dicarboxylic acid is oleic	http://www.hmdb.ca/metabolites/HMDB13227	|Endogenous|Food|
9.54_201.1127m/z	HMDB00603	C10H16O4	2.9	91.2	201.11	9.54	0.045	5	cis-4-Decenedioic acid	cis-4-Decenedioic acid is an unsaturated dicarboxylic acid. Its level increases in patients with medium chain acyl-CoA dehydrogenase deficiency, which is a disorder of fatty acid oxidation.	http://www.hmdb.ca/metabolites/HMDB00603	|Endogenous|Food|
9.54_201.1127m/z	HMDB01862	C5H8O2	2.9	96.8	201.11	9.54	0.045	5	2-Ethylacrylic acid	2-Ethylacrylic acid is an intermediate metabolite in the conversion of R-2-methylbutyrate into 2-ethylhydracrylic acid, which is variably increased in defects of isoleucine oxidation at distal steps in the catabolic pathway (3-oxoacyl-CoA thiolase deficie	http://www.hmdb.ca/metabolites/HMDB01862	|Endogenous|Food|
9.54_201.1127m/z	HMDB00509	C5H8O2	2.9	96.8	201.11	9.54	0.045	5	Senecioic acid	Senecioic acid appears in the urine of patients with 3-Methylcrotonic aciduria, which is a disorder characterised by urine that contains increased amounts of 3-methylcrotonic acid (Senecioic acid). It is caused by defects in a biotin-dependent reaction th	http://www.hmdb.ca/metabolites/HMDB00509	|Endogenous|Food|
10.70_427.2657m/z	HMDB13653	C23H38O7	-7.7	81	427.27	10.7	0.029	Infinity	Prostaglandin D2-1-glyceryl ester	2-Arachidonoyl glycerol (2-AG) has been isolated from porcine brain, and has been characterized as the natural endocannabinoid ligand for the CB1 receptor.1,2 Incubation of 2-AG with cyclooxygenase-2 (COX-2) and specific prostaglandin H2 (PGH2) isomerases	http://www.hmdb.ca/metabolites/HMDB13653	|Endogenous|Food|
10.70_427.2657m/z	HMDB13043	C23H38O7	-7.7	81	427.27	10.7	0.029	Infinity	Prostaglandin PGE2 1-glyceryl ester	2-Arachidonoyl glycerol (2-AG) has been isolated from porcine brain,1 and has been characterized as the natural endocannabinoid ligand for the CB1 receptor.2 Incubation of 2-AG with COX-2 and specific prostaglandin H2 (PGH2) isomerases in cell cultures an	http://www.hmdb.ca/metabolites/HMDB13043	|Endogenous|Food|
10.70_427.2657m/z	HMDB13045	C23H38O7	-7.7	81	427.27	10.7	0.029	Infinity	Prostaglandin PGE2 glyceryl ester	GE2 glycerol ester is a COX-2 oxidative metabolite of 2-arachidonoyl glycerol, modulates inhibitory synaptic transmission in mouse hippocampal neurons. 2-Arachidonoyl glycerol (2-AG) has been isolated from porcine brain,1 and has been characterized as the	http://www.hmdb.ca/metabolites/HMDB13045	|Endogenous|Food|
19.79_284.2961m/z	HMDB00269	C18H39NO2	4.2	89.3	284.3	19.79	0.031	Negative Infinity	Sphinganine	Sphinganine is a blocker postlysosomal cholesterol transport by inhibition of low-density lipoprotein-induced esterification of cholesterol and cause unesterified cholesterol to accumulate in perinuclear vesicles. It has been suggested the possibility tha	http://www.hmdb.ca/metabolites/HMDB00269	|Endogenous|Food|
18.61_171.1382m/z	HMDB10726	C10H18O2	1.4	92.9	171.14	18.61	0.00029	-3.86	trans-Dec-2-enoic acid	In humans fatty acids are predominantly formed in the liver and adipose tissue, and mammary glands during lactation. trans-Dec-2-enoic acid is an intermediate in fatty acid biosynthesis. Specifically, trans-Dec-2-enoic is converted from (R)-3-Hydroxydecan	http://www.hmdb.ca/metabolites/HMDB10726	|Endogenous|Food|
18.61_171.1382m/z	HMDB04980	C10H18O2	1.4	92.9	171.14	18.61	0.00029	-3.86	cis-4-Decenoic acid	4-Decenoic acid (and other intermediates of unsaturated fatty acid oxidation) has been found in increased amounts in liver, skeletal muscle and heart obtained post mortem from patients with medium-chain acyl-CoA dehydrogenase deficiency (MCADD), multiple	http://www.hmdb.ca/metabolites/HMDB04980	|Endogenous|Food|
18.61_171.1382m/z	HMDB12183	C10H18O2	1.4	92.9	171.14	18.61	0.00029	-3.86	8-Methylnonenoate	8-methyl-nonenoic acid is a fatty acid derivative from leucine/valine pathway.8-methyl-nonenoic acid plays a crucial role in determining the efficacy of capsaicin levels.It was evident that significantly high capsaicin was produced when 8-methyl-nonenoic	http://www.hmdb.ca/metabolites/HMDB12183	|Endogenous|Food|
13.39_544.3393m/z	HMDB10395	C28H50NO7P	-0.9	86.6	544.34	13.39	0.015	-16.08	LysoPC(20:4(5Z,8Z,11Z,14Z))	LysoPC(20:4(5Z,8Z,11Z,14Z)) is a lysophospholipid (LyP). It is a monoglycerophospholipid in which a phosphorylcholine moiety occupies a glycerol substitution site. Lysophosphatidylcholines can have different combinations of fatty acids of varying lengths	http://www.hmdb.ca/metabolites/HMDB10395	|Endogenous|Food|
13.39_544.3393m/z	HMDB10396	C28H50NO7P	-0.9	86.6	544.34	13.39	0.015	-16.08	LysoPC(20:4(8Z,11Z,14Z,17Z))	LysoPC(20:4(8Z,11Z,14Z,17Z)) is a lysophospholipid (LyP). It is a monoglycerophospholipid in which a phosphorylcholine moiety occupies a glycerol substitution site. Lysophosphatidylcholines can have different combinations of fatty acids of varying lengths	http://www.hmdb.ca/metabolites/HMDB10396	|Endogenous|Food|
13.39_544.3393m/z	HMDB10385	C26H52NO7P	3.7	88.5	544.34	13.39	0.015	-16.08	LysoPC(18:1(11Z))	LysoPC(18:1(11Z)) is a lysophospholipid (LyP). It is a monoglycerophospholipid in which a phosphorylcholine moiety occupies a glycerol substitution site. Lysophosphatidylcholines can have different combinations of fatty acids of varying lengths and satura	http://www.hmdb.ca/metabolites/HMDB10385	|Endogenous|Food|
13.39_544.3393m/z	HMDB02815	C26H52NO7P	3.7	88.5	544.34	13.39	0.015	-16.08	LysoPC(18:1(9Z))	LysoPC(18:1(9Z)) is a lysophospholipid (LyP). It is a monoglycerophospholipid in which a phosphorylcholine moiety occupies a glycerol substitution site. Lysophosphatidylcholines can have different combinations of fatty acids of varying lengths and saturat	http://www.hmdb.ca/metabolites/HMDB02815	|Endogenous|Food|
12.35_468.3078m/z	HMDB10379	C22H46NO7P	-1.5	85.6	468.31	12.35	0.0015	-12.71	LysoPC(14:0)	LysoPC(14:0) is a lysophospholipid (LyP). It is a monoglycerophospholipid in which a phosphorylcholine moiety occupies a glycerol substitution site. Lysophosphatidylcholines can have different combinations of fatty acids of varying lengths and saturation	http://www.hmdb.ca/metabolites/HMDB10379	|Endogenous|Food|
12.35_468.3078m/z	HMDB06461	C25H45NO4	4.1	83.5	468.31	12.35	0.0015	-12.71	Linoelaidyl carnitine	Linoelaidyl carnitine is an acylcarnitine. Numerous disorders have been described that lead to disturbances in energy production and in intermediary metabolism in the organism which are characterized by the production and excretion of unusual acylcarnitin	http://www.hmdb.ca/metabolites/HMDB06461	|Endogenous|Food|
12.35_468.3078m/z	HMDB06469	C25H45NO4	4.1	83.5	468.31	12.35	0.0015	-12.71	Linoleyl carnitine	Linoleyl carnitine is a long-chain acyl fatty acid derivative ester of carnitine. Long-chain acyl fatty acid derivatives accumulate in the cytosol and serum of patients suffering of mitochondrial carnitine palmitoyltransferase II (CPT II, EC 2.3.1.12) def	http://www.hmdb.ca/metabolites/HMDB06469	|Endogenous|Food|
12.81_494.3232m/z	HMDB10383	C24H48NO7P	-1.9	81.1	494.32	12.81	0.00087	-35.23	LysoPC(16:1(9Z))	LysoPC(16:1(9Z)) is a lysophospholipid (LyP). It is a monoglycerophospholipid in which a phosphorylcholine moiety occupies a glycerol substitution site. Lysophosphatidylcholines can have different combinations of fatty acids of varying lengths and saturat	http://www.hmdb.ca/metabolites/HMDB10383	|Endogenous|Food|
12.81_494.3232m/z	HMDB06510	C29H45NO4	-1.9	77.4	494.32	12.81	0.00087	-35.23	Cervonyl carnitine	Cervonyl carnitine is an acylcarnitine. Numerous disorders have been described that lead to disturbances in energy production and in intermediary metabolism in the organism which are characterized by the production and excretion of unusual acylcarnitines.	http://www.hmdb.ca/metabolites/HMDB06510	|Endogenous|Food|
12.81_494.3232m/z	HMDB12458	C27H42O4	-2.1	79.4	494.32	12.81	0.00087	-35.23	7 alpha-Hydroxy-3-oxo-4-cholestenoate	7 alpha-Hydroxy-3-oxo-4-cholestenoate is involved in the primary bile acid biosynthesis pathway. 7 alpha-Hydroxy-3-oxo-4-cholestenoate is created from either 3 beta,7 alpha-Dihydroxy-5-cholestenoate or 7 alpha,26-Dihydroxy-4-cholesten-3-one through the ac	http://www.hmdb.ca/metabolites/HMDB12458	|Endogenous|Food|
14.49_522.3549m/z	HMDB10385	C26H52NO7P	-1	85.6	522.35	14.49	0.0042	-4.76	LysoPC(18:1(11Z))	LysoPC(18:1(11Z)) is a lysophospholipid (LyP). It is a monoglycerophospholipid in which a phosphorylcholine moiety occupies a glycerol substitution site. Lysophosphatidylcholines can have different combinations of fatty acids of varying lengths and satura	http://www.hmdb.ca/metabolites/HMDB10385	|Endogenous|Food|
14.49_522.3549m/z	HMDB02815	C26H52NO7P	-1	85.6	522.35	14.49	0.0042	-4.76	LysoPC(18:1(9Z))	LysoPC(18:1(9Z)) is a lysophospholipid (LyP). It is a monoglycerophospholipid in which a phosphorylcholine moiety occupies a glycerol substitution site. Lysophosphatidylcholines can have different combinations of fatty acids of varying lengths and saturat	http://www.hmdb.ca/metabolites/HMDB02815	|Endogenous|Food|
16.50_429.3168m/z	HMDB10727	C12H22O3	-10	89.8	429.32	16.5	2.4e-05	Infinity	3-Oxododecanoic acid	In humans fatty acids are predominantly formed in the liver and adipose tissue, and mammary glands during lactation. 3-Oxo-Dodecanoic acid is an intermediate in fatty acid biosynthesis. Specifically, 3-Oxo-Dodecanoic acid is converted form Malonic acid vi	http://www.hmdb.ca/metabolites/HMDB10727	|Endogenous|Food|
4.71_263.1981m/z	HMDB12535	C17H28O3	-8.6	87.5	263.2	4.71	1.8e-05	3.68	12S-HHT	12(S)-HHTrE is an unusual product of the cyclooxygenase (COX) pathway and one of the primary arachidonic acid metabolites of the human platelet.1 It is biosynthesized by thromboxane (TX) synthesis from prostaglandin H2 (PGH2) concurrently with TXA2. The b	http://www.hmdb.ca/metabolites/HMDB12535	|Endogenous|Food|
5.30_279.1743m/z	HMDB12789	C20H26O3	-0.2	85.3	279.17	5.3	3.6e-06	4.34	4-Oxo-13-cis-retinoate	4-oxo-9-cis retinoic acid (4-oxo-9cRA) is identified as a major plasma metabolite of 9-cis retinoic acid. Plasma levels of 4-oxo-9-cRA were initially 71% of those of 9cRA, but in contrast to 9cRA, there was no decline in plasma levels.Despite a decline in	http://www.hmdb.ca/metabolites/HMDB12789	|Endogenous|Food|
5.01_279.1747m/z	HMDB12789	C20H26O3	1.3	81	279.17	5.01	1.2e-05	12.46	4-Oxo-13-cis-retinoate	4-oxo-9-cis retinoic acid (4-oxo-9cRA) is identified as a major plasma metabolite of 9-cis retinoic acid. Plasma levels of 4-oxo-9-cRA were initially 71% of those of 9cRA, but in contrast to 9cRA, there was no decline in plasma levels.Despite a decline in	http://www.hmdb.ca/metabolites/HMDB12789	|Endogenous|Food|
4.54_263.1981m/z	HMDB12535	C17H28O3	-8.6	84.6	263.2	4.54	0.00036	3.15	12S-HHT	12(S)-HHTrE is an unusual product of the cyclooxygenase (COX) pathway and one of the primary arachidonic acid metabolites of the human platelet.1 It is biosynthesized by thromboxane (TX) synthesis from prostaglandin H2 (PGH2) concurrently with TXA2. The b	http://www.hmdb.ca/metabolites/HMDB12535	|Endogenous|Food|
7.98_229.1423m/z	HMDB10719	C6H10O2	-4.9	96	229.14	7.98	0.01	2.55	trans-Hex-2-enoic acid	trans-Hex-2-enoic acid is fatty acid formed by the action of fatty acid synthases from acetyl-CoA and malonyl-CoA precursors. It is involved in the pathway, fatty acid biosynthesis. Specifically, it is the product of reaction between (R)-3-Hydroxyhexanoic	http://www.hmdb.ca/metabolites/HMDB10719	|Endogenous|Food|
8.60_293.1489m/z	HMDB13126	C11H19NO4	7.5	87.5	293.15	8.6	0.032	-2.04	Butenylcarnitine		http://www.hmdb.ca/metabolites/HMDB13126	|Endogenous|Food|
8.93_203.0831m/z	HMDB32060	C11H16O	-0.8	92.9	203.08	8.93	0.00036	-2.77	2-Butyl-4-methylphenol	2-Butyl-4-methylphenol is an antioxidant for lard 2-Butyl-4-methylphenol belongs to the family of Para Cresols. These are compounds containing a para cresol moiety, which consists of a benzene ring bearing one hydroxyl group at ring positions 1 and 4.	http://www.hmdb.ca/metabolites/HMDB32060	|Endogenous|Food|
8.55_425.2625m/z	HMDB00541	C25H38O4	-9.2	75.4	425.26	8.55	0.0035	2.23	7b-Hydroxy-3-oxo-5b-cholanoic acid	7b-Hydroxy-3-oxo-5b-cholanoic acid was one of the bile acids present in significant proportions during early gestation, identified in amniotic fluid. (PMID 2373959). A bile acid. Bile acids are steroid acids found predominantly in bile of mammals. The dis	http://www.hmdb.ca/metabolites/HMDB00541	|Endogenous|Food|
6.12_295.1520m/z	HMDB30555	C16H22O5	-6.7	87.2	295.15	6.12	1.4e-05	7.29	Tocopheronic acid	Human metabolite of a-Tocopherol <ht>BDR14-R</ht> Tocopheronic acid belongs to the family of Medium-chain Keto Acids and Derivatives. These are keto acids with a 6 to 12 carbon atoms long side chain.	http://www.hmdb.ca/metabolites/HMDB30555	|Endogenous|Food|
5.86_295.1519m/z	HMDB30555	C16H22O5	-7	89.1	295.15	5.86	0.0014	3.88	Tocopheronic acid	Human metabolite of a-Tocopherol <ht>BDR14-R</ht> Tocopheronic acid belongs to the family of Medium-chain Keto Acids and Derivatives. These are keto acids with a 6 to 12 carbon atoms long side chain.	http://www.hmdb.ca/metabolites/HMDB30555	|Endogenous|Food|
5.96_240.1225m/z	HMDB13130	C12H21NO6	-1.9	90.5	240.12	5.96	1.5e-09	2.82	Glutarylcarnitine	Glutaryl-L-carnitine.	http://www.hmdb.ca/metabolites/HMDB13130	|Endogenous|Food|
5.96_240.1225m/z	HMDB00824	C10H19NO4	8.7	93	240.12	5.96	1.5e-09	2.82	Propionylcarnitine	Propionylcarnitine is present in high abundance in the urine of patients with Methylmalonyl-CoA mutase (MUT) deficiency, (together with Methylmalonic acid). MUT is a mitochondrial enzyme that catalyzes the isomerization of methylmalonyl-CoA to succinyl-Co	http://www.hmdb.ca/metabolites/HMDB00824	|Endogenous|Food|
9.14_335.2176m/z	HMDB04362	C9H16O2	-5.49339	90.2103	335.218	9.13728	0.0182021	-2.71856	4-Hydroxynonenal	4-Hydroxynonenal (HNE), one of the major end products of lipid peroxidation, has been shown to be involved in signal transduction and available evidence suggests that it can affect cell cycle events in a concentration-dependent manner. glutathione S-trans	http://www.hmdb.ca/metabolites/HMDB04362	|Endogenous|Food|
12.35_468.3078m/z	HMDB11555	C25H40O4	-1.61512	83.8557	468.308	12.3518	0.00152922	-12.7131	MG(0:0/22:5(4Z,7Z,10Z,13Z,16Z)/0:0)	MG(0:0/22:5(4Z,7Z,10Z,13Z,16Z)/0:0) is a monoacylglyceride. A monoglyceride, more correctly known as a monoacylglycerol, is a glyceride consisting of one fatty acid chain covalently bonded to a glycerol molecule through an ester linkage. Monoacylglycerol	http://www.hmdb.ca/metabolites/HMDB11555	|Endogenous|Food|
12.35_468.3078m/z	HMDB11585	C25H40O4	-1.61512	83.8557	468.308	12.3518	0.00152922	-12.7131	MG(22:5(4Z,7Z,10Z,13Z,16Z)/0:0/0:0)	MG(22:5(4Z,7Z,10Z,13Z,16Z)/0:0/0:0) is a monoacylglyceride. A monoglyceride, more correctly known as a monoacylglycerol, is a glyceride consisting of one fatty acid chain covalently bonded to a glycerol molecule through an ester linkage. Monoacylglycerol	http://www.hmdb.ca/metabolites/HMDB11585	|Endogenous|Food|
12.35_468.3078m/z	HMDB11586	C25H40O4	-1.61512	83.8557	468.308	12.3518	0.00152922	-12.7131	MG(22:5(7Z,10Z,13Z,16Z,19Z)/0:0/0:0)	MG(22:5(7Z,10Z,13Z,16Z,19Z)/0:0/0:0) is a monoacylglyceride. A monoglyceride, more correctly known as a monoacylglycerol, is a glyceride consisting of one fatty acid chain covalently bonded to a glycerol molecule through an ester linkage. Monoacylglycerol	http://www.hmdb.ca/metabolites/HMDB11586	|Endogenous|Food|
12.35_468.3078m/z	HMDB11556	C25H40O4	-1.61512	83.8557	468.308	12.3518	0.00152922	-12.7131	MG(0:0/22:5(7Z,10Z,13Z,16Z,19Z)/0:0)	MG(0:0/22:5(7Z,10Z,13Z,16Z,19Z)/0:0) is a monoacylglyceride. A monoglyceride, more correctly known as a monoacylglycerol, is a glyceride consisting of one fatty acid chain covalently bonded to a glycerol molecule through an ester linkage. Monoacylglycerol	http://www.hmdb.ca/metabolites/HMDB11556	|Endogenous|Food|
12.81_494.3232m/z	HMDB11590	C27H42O4	-2.05625	79.4239	494.323	12.8062	0.000865916	-35.234	MG(24:6(6Z,9Z,12Z,15Z,18Z,21Z)/0:0/0:0)	MG(24:6(6Z,9Z,12Z,15Z,18Z,21Z)/0:0/0:0) is a monoacylglyceride. A monoglyceride, more correctly known as a monoacylglycerol, is a glyceride consisting of one fatty acid chain covalently bonded to a glycerol molecule through an ester linkage. Monoacylglyce	http://www.hmdb.ca/metabolites/HMDB11590	|Endogenous|Food|
12.81_494.3232m/z	HMDB11560	C27H42O4	-2.05625	79.4239	494.323	12.8062	0.000865916	-35.234	MG(0:0/24:6(6Z,9Z,12Z,15Z,18Z,21Z)/0:0)	MG(0:0/24:6(6Z,9Z,12Z,15Z,18Z,21Z)/0:0) is a monoacylglyceride. A monoglyceride, more correctly known as a monoacylglycerol, is a glyceride consisting of one fatty acid chain covalently bonded to a glycerol molecule through an ester linkage. Monoacylglyce	http://www.hmdb.ca/metabolites/HMDB11560	|Endogenous|Food|
8.55_425.2625m/z	HMDB11557	C25H38O4	-9.165	75.3806	425.263	8.5493	0.00352094	2.23248	MG(0:0/22:6(4Z,7Z,10Z,13Z,16Z,19Z)/0:0)	MG(0:0/22:6(4Z,7Z,10Z,13Z,16Z,19Z)/0:0) is a monoacylglyceride. A monoglyceride, more correctly known as a monoacylglycerol, is a glyceride consisting of one fatty acid chain covalently bonded to a glycerol molecule through an ester linkage. Monoacylglyce	http://www.hmdb.ca/metabolites/HMDB11557	|Endogenous|Food|
8.55_425.2625m/z	HMDB11587	C25H38O4	-9.165	75.3806	425.263	8.5493	0.00352094	2.23248	MG(22:6(4Z,7Z,10Z,13Z,16Z,19Z)/0:0/0:0)	MG(22:6(4Z,7Z,10Z,13Z,16Z,19Z)/0:0/0:0) is a monoacylglyceride. A monoglyceride, more correctly known as a monoacylglycerol, is a glyceride consisting of one fatty acid chain covalently bonded to a glycerol molecule through an ester linkage. Monoacylglyce	http://www.hmdb.ca/metabolites/HMDB11587	|Endogenous|Food|
8.55_425.2625m/z	HMDB11576	C23H40O4	-3.36893	76.9964	425.263	8.5493	0.00352094	2.23248	MG(20:3(5Z,8Z,11Z)/0:0/0:0)	MG(20:3(5Z,8Z,11Z)/0:0/0:0) is a monoacylglyceride. A monoglyceride, more correctly known as a monoacylglycerol, is a glyceride consisting of one fatty acid chain covalently bonded to a glycerol molecule through an ester linkage. Monoacylglycerol can be b	http://www.hmdb.ca/metabolites/HMDB11576	|Endogenous|Food|
8.55_425.2625m/z	HMDB11575	C23H40O4	-3.36893	76.9964	425.263	8.5493	0.00352094	2.23248	MG(20:3(11Z,14Z,17Z)/0:0/0:0)	MG(20:3(11Z,14Z,17Z)/0:0/0:0) is a monoacylglyceride. A monoglyceride, more correctly known as a monoacylglycerol, is a glyceride consisting of one fatty acid chain covalently bonded to a glycerol molecule through an ester linkage. Monoacylglycerol can be	http://www.hmdb.ca/metabolites/HMDB11575	|Endogenous|Food|
8.55_425.2625m/z	HMDB11546	C23H40O4	-3.36893	76.9964	425.263	8.5493	0.00352094	2.23248	MG(0:0/20:3(5Z,8Z,11Z)/0:0)	MG(0:0/20:3(5Z,8Z,11Z)/0:0) is a monoacylglyceride. A monoglyceride, more correctly known as a monoacylglycerol, is a glyceride consisting of one fatty acid chain covalently bonded to a glycerol molecule through an ester linkage. Monoacylglycerol can be b	http://www.hmdb.ca/metabolites/HMDB11546	|Endogenous|Food|
8.55_425.2625m/z	HMDB11577	C23H40O4	-3.36893	76.9964	425.263	8.5493	0.00352094	2.23248	MG(20:3(8Z,11Z,14Z)/0:0/0:0)	MG(20:3(8Z,11Z,14Z)/0:0/0:0) is a monoacylglyceride. A monoglyceride, more correctly known as a monoacylglycerol, is a glyceride consisting of one fatty acid chain covalently bonded to a glycerol molecule through an ester linkage. Monoacylglycerol can be	http://www.hmdb.ca/metabolites/HMDB11577	|Endogenous|Food|
8.55_425.2625m/z	HMDB11545	C23H40O4	-3.36893	76.9964	425.263	8.5493	0.00352094	2.23248	MG(0:0/20:3(11Z,14Z,17Z)/0:0)	MG(0:0/20:3(11Z,14Z,17Z)/0:0) is a monoacylglyceride. A monoglyceride, more correctly known as a monoacylglycerol, is a glyceride consisting of one fatty acid chain covalently bonded to a glycerol molecule through an ester linkage. Monoacylglycerol can be	http://www.hmdb.ca/metabolites/HMDB11545	|Endogenous|Food|
8.55_425.2625m/z	HMDB11547	C23H40O4	-3.36893	76.9964	425.263	8.5493	0.00352094	2.23248	MG(0:0/20:3(8Z,11Z,14Z)/0:0)	MG(0:0/20:3(8Z,11Z,14Z)/0:0) is a monoacylglyceride. A monoglyceride, more correctly known as a monoacylglycerol, is a glyceride consisting of one fatty acid chain covalently bonded to a glycerol molecule through an ester linkage. Monoacylglycerol can be	http://www.hmdb.ca/metabolites/HMDB11547	|Endogenous|Food|

## Sheet: Brain_0vs.6h_LPS
Compound	Accession	Chemical Formula	MassError(ppm)	Isotope.Similarity	m/z	Retentiontime(min)	Anova(p)	Fold Change	Name	description	HMDB Link	Origins
15.99_523.3634n	HMDB10384	C26H54NO7P	-0.8	85.7	524.37	15.99	0.016	-5.34237	LysoPC(18:0)	LysoPC(18:0) is a lysophospholipid (LyP). It is a monoglycerophospholipid in which a phosphorylcholine moiety occupies a glycerol substitution site. Lysophosphatidylcholines can have different combinations of fatty acids of varying lengths and saturation	http://www.hmdb.ca/metabolites/HMDB10384	|Endogenous|Food|
13.13_203.0231m/z	HMDB12208	C6H11N2O6P	6.4	91.7	203.02	13.13	0.00028	5.88958	D-Erythro-imidazole-glycerol-phosphate	D-Erythro-imidazole-glycerol-phosphate is an intermediate in Histidine metabolism. It is a substrate for imidazoleglycerol-phosphate dehydratase (hisB) and can be generated from Phosphoribulosyl-formimino-AICAR-phosphate then it is converted to Imidazole-	http://www.hmdb.ca/metabolites/HMDB12208	|Endogenous|
13.13_203.0231m/z	HMDB12236	C6H9N2O5P	6.9	91.9	203.02	13.13	0.00028	5.88958	Imidazole acetol-phosphate	Imidazole acetol-phosphate is involved in the histidine biosynthesis I pathway. Imidazole acetol-phosphate is created by the breakdown of D-erythro-imidazole-glycerol-phosphate into imidazole acetol-phosphate and H2O. Imidazoleglycerol-phosphate dehydrata	http://www.hmdb.ca/metabolites/HMDB12236	|Endogenous|
12.35_468.3078m/z	HMDB10379	C22H46NO7P	-1.5	85.6	468.31	12.35	0.025	-3.07429	LysoPC(14:0)	LysoPC(14:0) is a lysophospholipid (LyP). It is a monoglycerophospholipid in which a phosphorylcholine moiety occupies a glycerol substitution site. Lysophosphatidylcholines can have different combinations of fatty acids of varying lengths and saturation	http://www.hmdb.ca/metabolites/HMDB10379	|Endogenous|Food|
12.35_468.3078m/z	HMDB06461	C25H45NO4	4.1	83.5	468.31	12.35	0.025	-3.07429	Linoelaidyl carnitine	Linoelaidyl carnitine is an acylcarnitine. Numerous disorders have been described that lead to disturbances in energy production and in intermediary metabolism in the organism which are characterized by the production and excretion of unusual acylcarnitin	http://www.hmdb.ca/metabolites/HMDB06461	|Endogenous|Food|
12.35_468.3078m/z	HMDB06469	C25H45NO4	4.1	83.5	468.31	12.35	0.025	-3.07429	Linoleyl carnitine	Linoleyl carnitine is a long-chain acyl fatty acid derivative ester of carnitine. Long-chain acyl fatty acid derivatives accumulate in the cytosol and serum of patients suffering of mitochondrial carnitine palmitoyltransferase II (CPT II, EC 2.3.1.12) def	http://www.hmdb.ca/metabolites/HMDB06469	|Endogenous|Food|
12.35_468.3078m/z	HMDB12517	C25H40O4	-1.6	83.9	468.31	12.35	0.025	-3.07429	11'-Carboxy-gamma-chromanol	11'-Carboxy-gamma-tocopherol is a dehydrogenation carboxylate product of 11'-hydroxy-r-tocopherol by an unidentified microsomal enzyme(s) probably via an aldehyde intermediate. r-Tocopherol provides different antioxidant activities in food and in-vitro st	http://www.hmdb.ca/metabolites/HMDB12517	|Endogenous|
18.61_171.1382m/z	HMDB02203	C10H20O3	1.3	92.6	171.14	18.61	0.00048	-2.73214	3-Hydroxycapric acid	3-hydroxycapric acid is a normally occurring carboxylic acid in human blood plasma. Medium- and long-chain 3-hydroxymonocarboxylic acids represent intermediates in the beta-oxidation of fatty acids. They accumulate in the plasma of patients with an inheri	http://www.hmdb.ca/metabolites/HMDB02203	|Endogenous|
18.61_171.1382m/z	HMDB10725	C10H20O3	1.3	92.6	171.14	18.61	0.00048	-2.73214	(R)-3-Hydroxydecanoic acid	In humans fatty acids are predominantly formed in the liver and adipose tissue, and mammary glands during lactation.(R)-3-Hydroxydecanoic acid is an intermediate in fatty acid biosynthesis. Specifically,(R)-3-Hydroxydecanoic acid is converted from 3-Oxode	http://www.hmdb.ca/metabolites/HMDB10725	|Endogenous|
18.61_171.1382m/z	HMDB10726	C10H18O2	1.4	92.9	171.14	18.61	0.00048	-2.73214	trans-Dec-2-enoic acid	In humans fatty acids are predominantly formed in the liver and adipose tissue, and mammary glands during lactation. trans-Dec-2-enoic acid is an intermediate in fatty acid biosynthesis. Specifically, trans-Dec-2-enoic is converted from (R)-3-Hydroxydecan	http://www.hmdb.ca/metabolites/HMDB10726	|Endogenous|Food|
18.61_171.1382m/z	HMDB04980	C10H18O2	1.4	92.9	171.14	18.61	0.00048	-2.73214	cis-4-Decenoic acid	4-Decenoic acid (and other intermediates of unsaturated fatty acid oxidation) has been found in increased amounts in liver, skeletal muscle and heart obtained post mortem from patients with medium-chain acyl-CoA dehydrogenase deficiency (MCADD), multiple	http://www.hmdb.ca/metabolites/HMDB04980	|Endogenous|Food|
18.61_171.1382m/z	HMDB12183	C10H18O2	1.4	92.9	171.14	18.61	0.00048	-2.73214	8-Methylnonenoate	8-methyl-nonenoic acid is a fatty acid derivative from leucine/valine pathway.8-methyl-nonenoic acid plays a crucial role in determining the efficacy of capsaicin levels.It was evident that significantly high capsaicin was produced when 8-methyl-nonenoic	http://www.hmdb.ca/metabolites/HMDB12183	|Endogenous|Food|
12.07_323.1469m/z	HMDB05764	C13H24N4O3	-4	90.5	323.15	12.07	0.036	-2.75971	Melanostatin	Melanostatin (prolyl-leucyl-glycinamide) is a peptide hormone produced in the hypothalamus that inhibits the release of melanocyte-stimulating hormone (MSH).	http://www.hmdb.ca/metabolites/HMDB05764	|Endogenous|
12.07_323.1469m/z	HMDB06023	C11H15N5O4	2.2	92	323.15	12.07	0.036	-2.75971	3'-O-Methyladenosine	3-O-Methyladenosine is a methylated adenine residue.	http://www.hmdb.ca/metabolites/HMDB06023	|Endogenous|
12.07_323.1469m/z	HMDB04326	C11H15N5O4	2.2	92	323.15	12.07	0.036	-2.75971	2'-O-Methyladenosine	2'-O-Methyladenosine is a methylated adenine residue. 2'-O-Methyladenosine is a naturally occurring 2'-O-methylpurine nucleoside with long lasting hypotensive properties; resistance of 2'-O-methyladenosine against adenosine deaminase is thought to contrib	http://www.hmdb.ca/metabolites/HMDB04326	|Endogenous|
12.07_323.1469m/z	HMDB04044	C11H15N5O4	2.2	92	323.15	12.07	0.036	-2.75971	N6-Methyladenosine	N6-Methyladenosine is a methylated adenine residue. N6-Methyladenosine is an endogenous urinary nucleoside product of the degradation of transfer ribonucleic acid (tRNA); urinary nucleosides are biological markers for patients with colorectal cancer. tRNA	http://www.hmdb.ca/metabolites/HMDB04044	|Endogenous|
12.07_323.1469m/z	HMDB03331	C11H15N5O4	2.2	92	323.15	12.07	0.036	-2.75971	1-Methyladenosine	1-methyladenosine is one of the modified nucleosides, the levels of which are elevated in urine of patients with malignant tumors. Examination of expression of 1-methyladenosine is expected to be useful for the histological diagnosis of intraocular tumors	http://www.hmdb.ca/metabolites/HMDB03331	|Endogenous|
12.07_323.1469m/z	HMDB28823	C11H19N2O5-	6.5	92.8	323.15	12.07	0.036	-2.75971	Glutamyl-Leucine	Glutamyl-Leucine is a dipeptide composed of glutamate and leucine. It is an incomplete breakdown product of protein digestion or protein catabolism. Some dipeptides are known to have physiological or cell-signaling effects although most are simply short-l	http://www.hmdb.ca/metabolites/HMDB28823	|Endogenous|
12.07_323.1469m/z	HMDB28928	C11H19N2O5-	6.5	92.8	323.15	12.07	0.036	-2.75971	Leucyl-Glutamate	Leucyl-Glutamate is a dipeptide composed of leucine and glutamate. It is an incomplete breakdown product of protein digestion or protein catabolism. Some dipeptides are known to have physiological or cell-signaling effects although most are simply short-l	http://www.hmdb.ca/metabolites/HMDB28928	|Endogenous|
12.07_323.1469m/z	HMDB28822	C11H19N2O5-	6.5	92.8	323.15	12.07	0.036	-2.75971	Glutamyl-Isoleucine	Glutamyl-Isoleucine is a dipeptide composed of glutamate and isoleucine. It is an incomplete breakdown product of protein digestion or protein catabolism. Some dipeptides are known to have physiological or cell-signaling effects although most are simply s	http://www.hmdb.ca/metabolites/HMDB28822	|Endogenous|
12.07_323.1469m/z	HMDB28906	C11H19N2O5-	6.5	92.8	323.15	12.07	0.036	-2.75971	Isoleucyl-Glutamate	Isoleucyl-Glutamate is a dipeptide composed of isoleucine and glutamate. It is an incomplete breakdown product of protein digestion or protein catabolism. Some dipeptides are known to have physiological or cell-signaling effects although most are simply s	http://www.hmdb.ca/metabolites/HMDB28906	|Endogenous|
12.07_323.1469m/z	HMDB00510	C6H11NO4	6.1	98.6	323.15	12.07	0.036	-2.75971	Aminoadipic acid	Aminoadipic acid (2-aminoadipate) is a metabolite in the principal biochemical pathway of lysine. It is an intermediate in the metabolism (i.e. breakdown or degradation) of lysine and saccharopine.(Wikipedia). It antagonizes neuroexcitatory activity mod	http://www.hmdb.ca/metabolites/HMDB00510	|Endogenous|
12.07_323.1469m/z	HMDB13704	C8H10N2O	-3.3	96.9	323.15	12.07	0.036	-2.75971	6-Methylnicotinamide	6-methylnicotinamide is a derivative of nicotinamide. It is associated with early sign of Parkinson's disease. (PubMed: 8224447; PubMed: 8674737)	http://www.hmdb.ca/metabolites/HMDB13704	|Endogenous|
16.50_429.3168m/z	HMDB10727	C12H22O3	-10	89.8	429.32	16.5	1.5e-06	Infinity	3-Oxododecanoic acid	In humans fatty acids are predominantly formed in the liver and adipose tissue, and mammary glands during lactation. 3-Oxo-Dodecanoic acid is an intermediate in fatty acid biosynthesis. Specifically, 3-Oxo-Dodecanoic acid is converted form Malonic acid vi	http://www.hmdb.ca/metabolites/HMDB10727	|Endogenous|Food|
5.30_279.1743m/z	HMDB12789	C20H26O3	-0.2	85.3	279.17	5.3	0.00031	4.78248	4-Oxo-13-cis-retinoate	4-oxo-9-cis retinoic acid (4-oxo-9cRA) is identified as a major plasma metabolite of 9-cis retinoic acid. Plasma levels of 4-oxo-9-cRA were initially 71% of those of 9cRA, but in contrast to 9cRA, there was no decline in plasma levels.Despite a decline in	http://www.hmdb.ca/metabolites/HMDB12789	|Endogenous|Food|
5.01_279.1747m/z	HMDB12789	C20H26O3	1.3	81	279.17	5.01	0.0054	4.43918	4-Oxo-13-cis-retinoate	4-oxo-9-cis retinoic acid (4-oxo-9cRA) is identified as a major plasma metabolite of 9-cis retinoic acid. Plasma levels of 4-oxo-9-cRA were initially 71% of those of 9cRA, but in contrast to 9cRA, there was no decline in plasma levels.Despite a decline in	http://www.hmdb.ca/metabolites/HMDB12789	|Endogenous|Food|
4.94_127.0749m/z	HMDB01988	C7H12O3	-3	92	127.07	4.94	0.01	2.70698	4-Hydroxycyclohexylcarboxylic acid	4-Hydroxycyclohexylcarboxylic acid is a rare compound in urinary organic acid analysis.	http://www.hmdb.ca/metabolites/HMDB01988	|Endogenous|Microbial|
4.71_263.1981m/z	HMDB12535	C17H28O3	-8.6	87.5	263.2	4.71	0.00071	2.45596	12S-HHT	12(S)-HHTrE is an unusual product of the cyclooxygenase (COX) pathway and one of the primary arachidonic acid metabolites of the human platelet.1 It is biosynthesized by thromboxane (TX) synthesis from prostaglandin H2 (PGH2) concurrently with TXA2. The b	http://www.hmdb.ca/metabolites/HMDB12535	|Endogenous|Food|
4.71_263.1981m/z	HMDB00557	C6H13NO2	6.1	98.5	263.2	4.71	0.00071	2.45596	L-Alloisoleucine	L-alloisoleucine is a branched chain amino acid and is a stereo-isomer of L-isoleucine. It is a common constituent of human plasma (albeit at low levels). L-alloisoleucine is produced as a byproduct of isoleucine transamination. L-Isoleucine is one of the	http://www.hmdb.ca/metabolites/HMDB00557	|Endogenous|
4.71_263.1981m/z	HMDB01645	C6H13NO2	6.1	98.5	263.2	4.71	0.00071	2.45596	L-Norleucine	L-Norleucine is an unnatural amino acid that is used experimentally to study protein structure and function. It is structurally similar to methionine, however it does not contain sulfur. Aminocaproic acid works as an antifibrinolytic. It is a derivative o	http://www.hmdb.ca/metabolites/HMDB01645	|Endogenous|
4.71_263.1981m/z	HMDB03640	C6H13NO2	6.1	98.5	263.2	4.71	0.00071	2.45596	Beta-Leucine	Beta-leucine is a metabolite that is in the middle of a controversy over its presence in the human body. While there are reports that claim it as a human metabolite, there are others that deny its existence. Two examples:. Circulating levels of beta-leuci	http://www.hmdb.ca/metabolites/HMDB03640	|Endogenous|
4.71_263.1981m/z	HMDB13773	C6H13NO2	6.1	98.5	263.2	4.71	0.00071	2.45596	D-Leucine	An essential branched-chain amino acid important for hemoglobin formation. [PubChem]; Branched chain amino acids (BCAA) are essential amino acids whose carbon structure is marked by a branch point. These three amino acids are critical to human life and ar	http://www.hmdb.ca/metabolites/HMDB13773	|Endogenous|
9.57_313.1626m/z	HMDB28956	C12H26N4O3	-3.7	89.8	313.16	9.57	1.2e-06	2.99506	Lysyl-Lysine	Lysyl-Lysine is a dipeptied compoosed of two lysine residues. It is an incomplete breakdown product of protein digestion or protein catabolism. Some dipeptides are known to have physiological or cell-signaling effects although most are simply short-lived	http://www.hmdb.ca/metabolites/HMDB28956	|Endogenous|
6.12_295.1520m/z	HMDB30555	C16H22O5	-6.7	87.2	295.15	6.12	0.0031	3.05652	Tocopheronic acid	Human metabolite of a-Tocopherol <ht>BDR14-R</ht> Tocopheronic acid belongs to the family of Medium-chain Keto Acids and Derivatives. These are keto acids with a 6 to 12 carbon atoms long side chain.	http://www.hmdb.ca/metabolites/HMDB30555	|Endogenous|Food|
8.18_332.0693m/z	HMDB00676	C8H16N2O4S2	-6	85.8	332.07	8.18	0.043	2.14636	L-Homocystine	Homocystine is the double-bonded form of homocysteine, but it occurs only transiently before being converted to the harmless cystathionine via a vitamin B6-dependent enzyme. Homocystine and homocysteine-cysteine mixed disulfide account for >98% of total h	http://www.hmdb.ca/metabolites/HMDB00676	|Endogenous|
8.18_332.0693m/z	HMDB00575	C8H16N2O4S2	-6	85.8	332.07	8.18	0.043	2.14636	DL-Homocystine	Homocystine is the double-bonded form of homocysteine, but it occurs only transiently before being converted to the harmless cystathionine via a vitamin B6-dependent enzyme. Homocystine and homocysteine-cysteine mixed disulfide account for >98% of total h	http://www.hmdb.ca/metabolites/HMDB00575	|Endogenous|
13.20_316.2613n	HMDB11563	C18H36O4	-0.281537	88.5275	339.251	13.2019	0.0179186	2.07762	MG(15:0/0:0/0:0)	MG(15:0/0:0/0:0) is a monoacylglyceride. A monoglyceride, more correctly known as a monoacylglycerol, is a glyceride consisting of one fatty acid chain covalently bonded to a glycerol molecule through an ester linkage. Monoacylglycerol can be broadly divi	http://www.hmdb.ca/metabolites/HMDB11563	|Endogenous|Food|
13.20_316.2613n	HMDB11532	C18H36O4	-0.281537	88.5275	339.251	13.2019	0.0179186	2.07762	MG(0:0/15:0/0:0)	MG(0:0/15:0/0:0) is a monoacylglyceride. A monoglyceride, more correctly known as a monoacylglycerol, is a glyceride consisting of one fatty acid chain covalently bonded to a glycerol molecule through an ester linkage. Monoacylglycerol can be broadly divi	http://www.hmdb.ca/metabolites/HMDB11532	|Endogenous|Food|
12.35_468.3078m/z	HMDB11555	C25H40O4	-1.61512	83.8557	468.308	12.3518	0.0253576	-3.07429	MG(0:0/22:5(4Z,7Z,10Z,13Z,16Z)/0:0)	MG(0:0/22:5(4Z,7Z,10Z,13Z,16Z)/0:0) is a monoacylglyceride. A monoglyceride, more correctly known as a monoacylglycerol, is a glyceride consisting of one fatty acid chain covalently bonded to a glycerol molecule through an ester linkage. Monoacylglycerol	http://www.hmdb.ca/metabolites/HMDB11555	|Endogenous|Food|
12.35_468.3078m/z	HMDB11585	C25H40O4	-1.61512	83.8557	468.308	12.3518	0.0253576	-3.07429	MG(22:5(4Z,7Z,10Z,13Z,16Z)/0:0/0:0)	MG(22:5(4Z,7Z,10Z,13Z,16Z)/0:0/0:0) is a monoacylglyceride. A monoglyceride, more correctly known as a monoacylglycerol, is a glyceride consisting of one fatty acid chain covalently bonded to a glycerol molecule through an ester linkage. Monoacylglycerol	http://www.hmdb.ca/metabolites/HMDB11585	|Endogenous|Food|
12.35_468.3078m/z	HMDB11586	C25H40O4	-1.61512	83.8557	468.308	12.3518	0.0253576	-3.07429	MG(22:5(7Z,10Z,13Z,16Z,19Z)/0:0/0:0)	MG(22:5(7Z,10Z,13Z,16Z,19Z)/0:0/0:0) is a monoacylglyceride. A monoglyceride, more correctly known as a monoacylglycerol, is a glyceride consisting of one fatty acid chain covalently bonded to a glycerol molecule through an ester linkage. Monoacylglycerol	http://www.hmdb.ca/metabolites/HMDB11586	|Endogenous|Food|
12.35_468.3078m/z	HMDB11556	C25H40O4	-1.61512	83.8557	468.308	12.3518	0.0253576	-3.07429	MG(0:0/22:5(7Z,10Z,13Z,16Z,19Z)/0:0)	MG(0:0/22:5(7Z,10Z,13Z,16Z,19Z)/0:0) is a monoacylglyceride. A monoglyceride, more correctly known as a monoacylglycerol, is a glyceride consisting of one fatty acid chain covalently bonded to a glycerol molecule through an ester linkage. Monoacylglycerol	http://www.hmdb.ca/metabolites/HMDB11556	|Endogenous|Food|
16.49_473.3422m/z	HMDB04198	C31H46O2	7.16297	79.3913	473.342	16.4864	1.08312e-05	24.3525	Reduced Vitamin K (phylloquinone)	Vitamin K is a family of fat-soluble compounds with a common chemical structure based on 2-methyl-1,4-naphthoquinone. Phylloquinone is often called vitamin K1, phytomenadione or phytonadione. Sometimes a distinction is made with phylloquinone considered n	http://www.hmdb.ca/metabolites/HMDB04198	|Endogenous|Food|
5.30_279.1743m/z	HMDB06285	C20H26O3	-0.183955	85.2504	279.174	5.29998	0.000305463	4.78248	4-oxo-Retinoic acid	4-oxo-Retinoic acid is a biologically active geometric isomer of retinoic acid (RA). 4-oxo-retinoic acid is generated from its precursor canthaxanthin and enhances gap junctional communication in cells. Metabolic transformation of all-trans RA to 4-hydrox	http://www.hmdb.ca/metabolites/HMDB06285	|Drug metabolite|Endogenous|Food|
5.01_279.1747m/z	HMDB06285	C20H26O3	1.26212	81.0378	279.175	5.00905	0.00535909	4.43918	4-oxo-Retinoic acid	4-oxo-Retinoic acid is a biologically active geometric isomer of retinoic acid (RA). 4-oxo-retinoic acid is generated from its precursor canthaxanthin and enhances gap junctional communication in cells. Metabolic transformation of all-trans RA to 4-hydrox	http://www.hmdb.ca/metabolites/HMDB06285	|Drug metabolite|Endogenous|Food|

## Sheet: Brain_0vs.24h_LPS
Compound	Accession	Chemical Formula	MassError(ppm)	IsotopeSimilarity	m/z	Retentiontime(min)	Anova(p)	Fold Change	Name	Full Description	HMDB Link	Origins
3.67_268.0816n	HMDB00425	C9H16O9	8.2	97.56	537.17	3.67	4.6e-05	-2.32	3-Deoxy-D-glycero-D-galacto-2-nonulosonic acid	3-Deoxy-D-glycero-D-galacto-2-nonulosonic acid (KDN) is a sialic acid (Sia) that is ubiquitously expressed in vertebrates during normal development and tumorigenesis. Its expression is thought to be regulated by multiple biosynthetic steps catalyzed by se	http://www.hmdb.ca/metabolites/HMDB00425	|Endogenous|
3.67_268.0816n	HMDB03040	C10H12N4O5	3.2	96.49	537.17	3.67	4.6e-05	-2.32	Arabinosylhypoxanthine	Arabinosylhypoxanthine is found to have a potent antiviral activity for herpes simplex infected cells. The final metabolite in the conversion of Arabinosyladenine-5'-monophosphate to arabinosyladenine then to Arabinosylhypoxanthine.	http://www.hmdb.ca/metabolites/HMDB03040	|Endogenous|
18.61_171.1382m/z	HMDB10726	C10H18O2	1.4	92.85	171.14	18.61	0.00012	-5.69	trans-Dec-2-enoic acid	In humans fatty acids are predominantly formed in the liver and adipose tissue, and mammary glands during lactation. trans-Dec-2-enoic acid is an intermediate in fatty acid biosynthesis. Specifically, trans-Dec-2-enoic is converted from (R)-3-Hydroxydecan	http://www.hmdb.ca/metabolites/HMDB10726	|Endogenous|Food|
12.81_494.3232m/z	HMDB12458	C27H42O4	-2.1	79.42	494.32	12.81	6.3e-05	-10.73	7 alpha-Hydroxy-3-oxo-4-cholestenoate	7 alpha-Hydroxy-3-oxo-4-cholestenoate is involved in the primary bile acid biosynthesis pathway. 7 alpha-Hydroxy-3-oxo-4-cholestenoate is created from either 3 beta,7 alpha-Dihydroxy-5-cholestenoate or 7 alpha,26-Dihydroxy-4-cholesten-3-one through the ac	http://www.hmdb.ca/metabolites/HMDB12458	|Endogenous|Food|
3.67_271.1032m/z	HMDB28755	C10H14N4O5	-1.9	87.3	271.1	3.67	0.019	-2.18	Aspartyl-Histidine	Aspartyl-Histidine is a dipeptide composed of aspartate and histidine. It is an incomplete breakdown product of protein digestion or protein catabolism. Some dipeptides are known to have physiological or cell-signaling effects although most are simply sho	http://www.hmdb.ca/metabolites/HMDB28755	|Endogenous|
3.67_271.1032m/z	HMDB28881	C10H14N4O5	-1.9	87.3	271.1	3.67	0.019	-2.18	Histidinyl-Aspartate	Histidinyl-Aspartate is a dipeptide composed of histidine and aspartate. It is an incomplete breakdown product of protein digestion or protein catabolism. Some dipeptides are known to have physiological or cell-signaling effects although most are simply s	http://www.hmdb.ca/metabolites/HMDB28881	|Endogenous|
3.67_271.1032m/z	HMDB13075	C10H20N2O4	-9.9	88.09	271.1	3.67	0.019	-2.18	Spermic acid 2	Spermic acid 2 is a diamide which is identified as urinary metabolites. of putrescine and spermine, and was subsequently identified and quantified. in urines of healthy persons and cancer patients.	http://www.hmdb.ca/metabolites/HMDB13075	|Endogenous|
3.67_271.1032m/z	HMDB28917	C10H20N2O4	-9.9	88.09	271.1	3.67	0.019	-2.18	Isoleucyl-Threonine	Isoleucyl-Threonine is a dipeptide composed of isoleucine and threonine. It is an incomplete breakdown product of protein digestion or protein catabolism. Some dipeptides are known to have physiological or cell-signaling effects although most are simply s	http://www.hmdb.ca/metabolites/HMDB28917	|Endogenous|
3.67_271.1032m/z	HMDB29064	C10H20N2O4	-9.9	88.09	271.1	3.67	0.019	-2.18	Threoninyl-Isoleucine	Threoninyl-Isoleucine is a dipeptide composed of threonine and isoleucine. It is an incomplete breakdown product of protein digestion or protein catabolism. Some dipeptides are known to have physiological or cell-signaling effects although most are simply	http://www.hmdb.ca/metabolites/HMDB29064	|Endogenous|
3.67_271.1032m/z	HMDB29065	C10H20N2O4	-9.9	88.09	271.1	3.67	0.019	-2.18	Threoninyl-Leucine	Threoninyl-Leucine is a dipeptide composed of threonine and leucine. It is an incomplete breakdown product of protein digestion or protein catabolism. Some dipeptides are known to have physiological or cell-signaling effects although most are simply short	http://www.hmdb.ca/metabolites/HMDB29065	|Endogenous|
10.53_250.1790m/z	HMDB13324	C15H27NO4	-3.9	88.14	250.18	10.53	2e-07	-3.33	2-Octenoylcarnitine		http://www.hmdb.ca/metabolites/HMDB13324	|Endogenous|Food|
10.53_250.1790m/z	HMDB00947	C11H22O2	6.9	92.91	250.18	10.53	2e-07	-3.33	Undecanoic acid	Undecanoic acid is a medium chain length monocarboxylic acid that appears to be involved in the control of triacylglycerol synthesis.(PMID 1739406). It is found in breast milk produced by women in the United States (PMID 16332663), in infant formulas ( Ml	http://www.hmdb.ca/metabolites/HMDB00947	|Endogenous|Food|
10.53_250.1790m/z	HMDB02373	C11H22O2	6.9	92.91	250.18	10.53	2e-07	-3.33	4,6-Dimethylnonanoic acid	4,6-Dimethylnonanoic acid is produced in the peroxisomes from pristanic acid (where undergoes three cycles of &#946;-oxidation) and then exported to the mitochondria or hydrolyzed by an acyl-CoA thioesterase and transported to the mitochondrion, followed	http://www.hmdb.ca/metabolites/HMDB02373	|Endogenous|Food|
10.53_250.1790m/z	HMDB36034	C11H22O2	6.9	92.91	250.18	10.53	2e-07	-3.33	6,6-Dimethoxy-2,5,5-trimethyl-2-hexene	6,6-Dimethoxy-2,5,5-trimethyl-2-hexene is a fragrance ingredient with a grapefruit-like aroma 6,6-Dimethoxy-2,5,5-trimethyl-2-hexene belongs to the family of Fatty Acid Esters. These are carboxylic ester derivatives of a fatty acid.	http://www.hmdb.ca/metabolites/HMDB36034	|Endogenous|Food|
10.70_427.2657m/z	HMDB13653	C23H38O7	-7.7	81.04	427.27	10.7	0.0028	8.66	Prostaglandin D2-1-glyceryl ester	2-Arachidonoyl glycerol (2-AG) has been isolated from porcine brain, and has been characterized as the natural endocannabinoid ligand for the CB1 receptor.1,2 Incubation of 2-AG with cyclooxygenase-2 (COX-2) and specific prostaglandin H2 (PGH2) isomerases	http://www.hmdb.ca/metabolites/HMDB13653	|Endogenous|Food|
10.70_427.2657m/z	HMDB13043	C23H38O7	-7.7	81.04	427.27	10.7	0.0028	8.66	Prostaglandin PGE2 1-glyceryl ester	2-Arachidonoyl glycerol (2-AG) has been isolated from porcine brain,1 and has been characterized as the natural endocannabinoid ligand for the CB1 receptor.2 Incubation of 2-AG with COX-2 and specific prostaglandin H2 (PGH2) isomerases in cell cultures an	http://www.hmdb.ca/metabolites/HMDB13043	|Endogenous|Food|
10.70_427.2657m/z	HMDB13045	C23H38O7	-7.7	81.04	427.27	10.7	0.0028	8.66	Prostaglandin PGE2 glyceryl ester	GE2 glycerol ester is a COX-2 oxidative metabolite of 2-arachidonoyl glycerol, modulates inhibitory synaptic transmission in mouse hippocampal neurons. 2-Arachidonoyl glycerol (2-AG) has been isolated from porcine brain,1 and has been characterized as the	http://www.hmdb.ca/metabolites/HMDB13045	|Endogenous|Food|
18.61_171.1382m/z	HMDB02203	C10H20O3	1.3	92.63	171.14	18.61	0.00012	-5.69	3-Hydroxycapric acid	3-hydroxycapric acid is a normally occurring carboxylic acid in human blood plasma. Medium- and long-chain 3-hydroxymonocarboxylic acids represent intermediates in the beta-oxidation of fatty acids. They accumulate in the plasma of patients with an inheri	http://www.hmdb.ca/metabolites/HMDB02203	|Endogenous|
18.61_171.1382m/z	HMDB10725	C10H20O3	1.3	92.63	171.14	18.61	0.00012	-5.69	(R)-3-Hydroxydecanoic acid	In humans fatty acids are predominantly formed in the liver and adipose tissue, and mammary glands during lactation.(R)-3-Hydroxydecanoic acid is an intermediate in fatty acid biosynthesis. Specifically,(R)-3-Hydroxydecanoic acid is converted from 3-Oxode	http://www.hmdb.ca/metabolites/HMDB10725	|Endogenous|
18.61_171.1382m/z	HMDB04980	C10H18O2	1.4	92.85	171.14	18.61	0.00012	-5.69	cis-4-Decenoic acid	4-Decenoic acid (and other intermediates of unsaturated fatty acid oxidation) has been found in increased amounts in liver, skeletal muscle and heart obtained post mortem from patients with medium-chain acyl-CoA dehydrogenase deficiency (MCADD), multiple	http://www.hmdb.ca/metabolites/HMDB04980	|Endogenous|Food|
18.61_171.1382m/z	HMDB12183	C10H18O2	1.4	92.85	171.14	18.61	0.00012	-5.69	8-Methylnonenoate	8-methyl-nonenoic acid is a fatty acid derivative from leucine/valine pathway.8-methyl-nonenoic acid plays a crucial role in determining the efficacy of capsaicin levels.It was evident that significantly high capsaicin was produced when 8-methyl-nonenoic	http://www.hmdb.ca/metabolites/HMDB12183	|Endogenous|Food|
9.92_313.1622m/z	HMDB28956	C12H26N4O3	-5.4	85.74	313.16	9.92	0.00071	Infinity	Lysyl-Lysine	Lysyl-Lysine is a dipeptied compoosed of two lysine residues. It is an incomplete breakdown product of protein digestion or protein catabolism. Some dipeptides are known to have physiological or cell-signaling effects although most are simply short-lived	http://www.hmdb.ca/metabolites/HMDB28956	|Endogenous|
9.92_313.1622m/z	HMDB03464	C5H11N3O2	9.3	93.19	313.16	9.92	0.00071	Infinity	4-Guanidinobutanoic acid	4-Guanidinobutanoate is a normal metabolite present in low concentrations. Patients with hyperargininemia have an arginase deficiency which leads to blockade of the urea cycle in the last step with several clinical symptoms. Owing to the arginase deficien	http://www.hmdb.ca/metabolites/HMDB03464	|Endogenous|
16.50_429.3168m/z	HMDB10727	C12H22O3	-10	89.8	429.32	16.5	9.2e-06	Infinity	3-Oxododecanoic acid	In humans fatty acids are predominantly formed in the liver and adipose tissue, and mammary glands during lactation. 3-Oxo-Dodecanoic acid is an intermediate in fatty acid biosynthesis. Specifically, 3-Oxo-Dodecanoic acid is converted form Malonic acid vi	http://www.hmdb.ca/metabolites/HMDB10727	|Endogenous|Food|
15.08_335.1234m/z	HMDB13029	C8H9NO3	-1.1	98.35	335.12	15.08	0.0086	-2.32	Noradrenochrome o-semiquinone	Noradrenochrome o-semiquinone is a intermediate metabolite in the reduction of noradrenochrome. Noradrenochrome is an aminochrome and is closely related to adrenochrome and dopaminochrome. This compound is present in human brain, induces a combination of	http://www.hmdb.ca/metabolites/HMDB13029	|Endogenous|
15.08_335.1234m/z	HMDB01545	C8H9NO3	-1.1	98.35	335.12	15.08	0.0086	-2.32	Pyridoxal	The 4-carboxyaldehyde form of vitamin B6 which is converted to pyridoxal phosphate which is a coenzyme for synthesis of amino acids, neurotransmitters (serotonin, norepinephrine), sphingolipids, aminolevulinic acid.	http://www.hmdb.ca/metabolites/HMDB01545	|Endogenous|
15.08_335.1234m/z	HMDB04290	C8H9NO3	-1.1	98.35	335.12	15.08	0.0086	-2.32	Isopyridoxal	Isopyridoxal is an active vitamer of the B6 complex in humans. (PMID 2208740). Vitamin B(6) is an essential component in human diet. (PMID 12686115). Vitamin B6 status (together with other vitamins from the B complex) is also related to Hyperhomocysteinem	http://www.hmdb.ca/metabolites/HMDB04290	|Endogenous|
13.36_520.3391m/z	HMDB10386	C26H50NO7P	-1.3	81.69	520.34	13.36	0.035	Negative Infinity	LysoPC(18:2(9Z,12Z))	LysoPC(18:2(9Z,12Z)) is a lysophospholipid (LyP). It is a monoglycerophospholipid in which a phosphorylcholine moiety occupies a glycerol substitution site. Lysophosphatidylcholines can have different combinations of fatty acids of varying lengths and sat	http://www.hmdb.ca/metabolites/HMDB10386	|Endogenous|Food|
13.13_203.0231m/z	HMDB12208	C6H11N2O6P	6.4	91.69	203.02	13.13	0.0028	5.81	D-Erythro-imidazole-glycerol-phosphate	D-Erythro-imidazole-glycerol-phosphate is an intermediate in Histidine metabolism. It is a substrate for imidazoleglycerol-phosphate dehydratase (hisB) and can be generated from Phosphoribulosyl-formimino-AICAR-phosphate then it is converted to Imidazole-	http://www.hmdb.ca/metabolites/HMDB12208	|Endogenous|
13.13_203.0231m/z	HMDB12236	C6H9N2O5P	6.9	91.92	203.02	13.13	0.0028	5.81	Imidazole acetol-phosphate	Imidazole acetol-phosphate is involved in the histidine biosynthesis I pathway. Imidazole acetol-phosphate is created by the breakdown of D-erythro-imidazole-glycerol-phosphate into imidazole acetol-phosphate and H2O. Imidazoleglycerol-phosphate dehydrata	http://www.hmdb.ca/metabolites/HMDB12236	|Endogenous|
13.34_568.3389m/z	HMDB10404	C30H50NO7P	-1.6	83.1	568.34	13.34	0.012	Negative Infinity	LysoPC(22:6(4Z,7Z,10Z,13Z,16Z,19Z))	LysoPC(22:6(4Z,7Z,10Z,13Z,16Z,19Z)) is a lysophospholipid (LyP). It is a monoglycerophospholipid in which a phosphorylcholine moiety occupies a glycerol substitution site. Lysophosphatidylcholines can have different combinations of fatty acids of varying	http://www.hmdb.ca/metabolites/HMDB10404	|Endogenous|Food|
13.34_568.3389m/z	HMDB10394	C28H52NO7P	2.8	84.88	568.34	13.34	0.012	Negative Infinity	LysoPC(20:3(8Z,11Z,14Z))	LysoPC(20:3(8Z,11Z,14Z)) is a lysophospholipid (LyP). It is a monoglycerophospholipid in which a phosphorylcholine moiety occupies a glycerol substitution site. Lysophosphatidylcholines can have different combinations of fatty acids of varying lengths and	http://www.hmdb.ca/metabolites/HMDB10394	|Endogenous|Food|
13.34_568.3389m/z	HMDB10393	C28H52NO7P	2.8	84.88	568.34	13.34	0.012	Negative Infinity	LysoPC(20:3(5Z,8Z,11Z))	LysoPC(20:3(5Z,8Z,11Z)) is a lysophospholipid (LyP). It is a monoglycerophospholipid in which a phosphorylcholine moiety occupies a glycerol substitution site. Lysophosphatidylcholines can have different combinations of fatty acids of varying lengths and	http://www.hmdb.ca/metabolites/HMDB10393	|Endogenous|Food|
13.34_568.3389m/z	HMDB10384	C26H54NO7P	7.5	86.77	568.34	13.34	0.012	Negative Infinity	LysoPC(18:0)	LysoPC(18:0) is a lysophospholipid (LyP). It is a monoglycerophospholipid in which a phosphorylcholine moiety occupies a glycerol substitution site. Lysophosphatidylcholines can have different combinations of fatty acids of varying lengths and saturation	http://www.hmdb.ca/metabolites/HMDB10384	|Endogenous|Food|
13.39_544.3393m/z	HMDB10395	C28H50NO7P	-0.9	86.59	544.34	13.39	7.9e-05	-94.17	LysoPC(20:4(5Z,8Z,11Z,14Z))	LysoPC(20:4(5Z,8Z,11Z,14Z)) is a lysophospholipid (LyP). It is a monoglycerophospholipid in which a phosphorylcholine moiety occupies a glycerol substitution site. Lysophosphatidylcholines can have different combinations of fatty acids of varying lengths	http://www.hmdb.ca/metabolites/HMDB10395	|Endogenous|Food|
13.39_544.3393m/z	HMDB10396	C28H50NO7P	-0.9	86.59	544.34	13.39	7.9e-05	-94.17	LysoPC(20:4(8Z,11Z,14Z,17Z))	LysoPC(20:4(8Z,11Z,14Z,17Z)) is a lysophospholipid (LyP). It is a monoglycerophospholipid in which a phosphorylcholine moiety occupies a glycerol substitution site. Lysophosphatidylcholines can have different combinations of fatty acids of varying lengths	http://www.hmdb.ca/metabolites/HMDB10396	|Endogenous|Food|
13.39_544.3393m/z	HMDB10385	C26H52NO7P	3.7	88.51	544.34	13.39	7.9e-05	-94.17	LysoPC(18:1(11Z))	LysoPC(18:1(11Z)) is a lysophospholipid (LyP). It is a monoglycerophospholipid in which a phosphorylcholine moiety occupies a glycerol substitution site. Lysophosphatidylcholines can have different combinations of fatty acids of varying lengths and satura	http://www.hmdb.ca/metabolites/HMDB10385	|Endogenous|Food|
13.39_544.3393m/z	HMDB02815	C26H52NO7P	3.7	88.51	544.34	13.39	7.9e-05	-94.17	LysoPC(18:1(9Z))	LysoPC(18:1(9Z)) is a lysophospholipid (LyP). It is a monoglycerophospholipid in which a phosphorylcholine moiety occupies a glycerol substitution site. Lysophosphatidylcholines can have different combinations of fatty acids of varying lengths and saturat	http://www.hmdb.ca/metabolites/HMDB02815	|Endogenous|Food|
12.81_494.3232m/z	HMDB10383	C24H48NO7P	-1.9	81.09	494.32	12.81	6.3e-05	-10.73	LysoPC(16:1(9Z))	LysoPC(16:1(9Z)) is a lysophospholipid (LyP). It is a monoglycerophospholipid in which a phosphorylcholine moiety occupies a glycerol substitution site. Lysophosphatidylcholines can have different combinations of fatty acids of varying lengths and saturat	http://www.hmdb.ca/metabolites/HMDB10383	|Endogenous|Food|
12.81_494.3232m/z	HMDB06510	C29H45NO4	-1.9	77.43	494.32	12.81	6.3e-05	-10.73	Cervonyl carnitine	Cervonyl carnitine is an acylcarnitine. Numerous disorders have been described that lead to disturbances in energy production and in intermediary metabolism in the organism which are characterized by the production and excretion of unusual acylcarnitines.	http://www.hmdb.ca/metabolites/HMDB06510	|Endogenous|Food|
4.94_126.0314n	HMDB13674	C6H6O3	-2.1	95.95	127.04	4.94	4.6e-07	2.18	1,2,3-Trihydroxybenzene	Pyrogallol or benzene-1,2,3-triol is a benzenetriol. It is a white crystalline powder and a powerful reducing agent. It was first prepared by Scheele 1786 by heating gallic acid. An alternate preparation is heating para-chlorophenoldisulphonic acid with p	http://www.hmdb.ca/metabolites/HMDB13674	|Endogenous|
4.94_126.0314n	HMDB13675	C6H6O3	-2.1	95.95	127.04	4.94	4.6e-07	2.18	1,3,5-Trihydroxybenzene	Phloroglucinol is a benzenetriol. It is an organic compound that is used in the synthesis of pharmaceuticals and explosives. This molecule exists in two forms, or tautomers, 1,3,5-trihydroxybenzene, which has phenol-like, and 1,3,5-cyclohexanetrione (phlo	http://www.hmdb.ca/metabolites/HMDB13675	|Endogenous|
9.54_243.1845n	HMDB13286	C13H25NO3	4.3	90.78	266.17	9.54	0.042	-2.26	N-Undecanoylglycine	N-Undecanoylglycine is an acylglycine with C-11 fatty acid group as the acyl moiety. Acylglycines 1 possess a common amidoacetic acid moiety and are normally minor metabolites of fatty acids. Elevated levels of certain acylglycines appear in the urine and	http://www.hmdb.ca/metabolites/HMDB13286	|Endogenous|
12.81_494.3232m/z	HMDB13279	C11H21NO3	7.3	94.41	494.32	12.81	6.3e-05	-10.73	N-Nonanoylglycine	N-Nonanoylglycine is an acylglycine with C-9 fatty acid group as the acyl moiety. Acylglycines 1 possess a common amidoacetic acid moiety and are normally minor metabolites of fatty acids. Elevated levels of certain acylglycines appear in the urine and bl	http://www.hmdb.ca/metabolites/HMDB13279	|Endogenous|
12.35_468.3078m/z	HMDB10379	C22H46NO7P	-1.5	85.61	468.31	12.35	0.0042	-4.7	LysoPC(14:0)	LysoPC(14:0) is a lysophospholipid (LyP). It is a monoglycerophospholipid in which a phosphorylcholine moiety occupies a glycerol substitution site. Lysophosphatidylcholines can have different combinations of fatty acids of varying lengths and saturation	http://www.hmdb.ca/metabolites/HMDB10379	|Endogenous|Food|
12.35_468.3078m/z	HMDB06461	C25H45NO4	4.1	83.5	468.31	12.35	0.0042	-4.7	Linoelaidyl carnitine	Linoelaidyl carnitine is an acylcarnitine. Numerous disorders have been described that lead to disturbances in energy production and in intermediary metabolism in the organism which are characterized by the production and excretion of unusual acylcarnitin	http://www.hmdb.ca/metabolites/HMDB06461	|Endogenous|Food|
12.35_468.3078m/z	HMDB06469	C25H45NO4	4.1	83.5	468.31	12.35	0.0042	-4.7	Linoleyl carnitine	Linoleyl carnitine is a long-chain acyl fatty acid derivative ester of carnitine. Long-chain acyl fatty acid derivatives accumulate in the cytosol and serum of patients suffering of mitochondrial carnitine palmitoyltransferase II (CPT II, EC 2.3.1.12) def	http://www.hmdb.ca/metabolites/HMDB06469	|Endogenous|Food|
12.35_468.3078m/z	HMDB12517	C25H40O4	-1.6	83.86	468.31	12.35	0.0042	-4.7	11'-Carboxy-gamma-chromanol	11'-Carboxy-gamma-tocopherol is a dehydrogenation carboxylate product of 11'-hydroxy-r-tocopherol by an unidentified microsomal enzyme(s) probably via an aldehyde intermediate. r-Tocopherol provides different antioxidant activities in food and in-vitro st	http://www.hmdb.ca/metabolites/HMDB12517	|Endogenous|
4.71_263.1981m/z	HMDB12535	C17H28O3	-8.6	87.48	263.2	4.71	1.2e-05	3.97	12S-HHT	12(S)-HHTrE is an unusual product of the cyclooxygenase (COX) pathway and one of the primary arachidonic acid metabolites of the human platelet.1 It is biosynthesized by thromboxane (TX) synthesis from prostaglandin H2 (PGH2) concurrently with TXA2. The b	http://www.hmdb.ca/metabolites/HMDB12535	|Endogenous|Food|
4.71_263.1981m/z	HMDB00557	C6H13NO2	6.1	98.54	263.2	4.71	1.2e-05	3.97	L-Alloisoleucine	L-alloisoleucine is a branched chain amino acid and is a stereo-isomer of L-isoleucine. It is a common constituent of human plasma (albeit at low levels). L-alloisoleucine is produced as a byproduct of isoleucine transamination. L-Isoleucine is one of the	http://www.hmdb.ca/metabolites/HMDB00557	|Endogenous|
4.71_263.1981m/z	HMDB01645	C6H13NO2	6.1	98.54	263.2	4.71	1.2e-05	3.97	L-Norleucine	L-Norleucine is an unnatural amino acid that is used experimentally to study protein structure and function. It is structurally similar to methionine, however it does not contain sulfur. Aminocaproic acid works as an antifibrinolytic. It is a derivative o	http://www.hmdb.ca/metabolites/HMDB01645	|Endogenous|
4.71_263.1981m/z	HMDB03640	C6H13NO2	6.1	98.54	263.2	4.71	1.2e-05	3.97	Beta-Leucine	Beta-leucine is a metabolite that is in the middle of a controversy over its presence in the human body. While there are reports that claim it as a human metabolite, there are others that deny its existence. Two examples:. Circulating levels of beta-leuci	http://www.hmdb.ca/metabolites/HMDB03640	|Endogenous|
4.71_263.1981m/z	HMDB13773	C6H13NO2	6.1	98.54	263.2	4.71	1.2e-05	3.97	D-Leucine	An essential branched-chain amino acid important for hemoglobin formation. [PubChem]; Branched chain amino acids (BCAA) are essential amino acids whose carbon structure is marked by a branch point. These three amino acids are critical to human life and ar	http://www.hmdb.ca/metabolites/HMDB13773	|Endogenous|
4.94_127.0749m/z	HMDB01988	C7H12O3	-3	91.99	127.07	4.94	2.6e-05	6.44	4-Hydroxycyclohexylcarboxylic acid	4-Hydroxycyclohexylcarboxylic acid is a rare compound in urinary organic acid analysis.	http://www.hmdb.ca/metabolites/HMDB01988	|Endogenous|Microbial|
5.30_279.1743m/z	HMDB12789	C20H26O3	-0.2	85.25	279.17	5.3	4.1e-05	6.89	4-Oxo-13-cis-retinoate	4-oxo-9-cis retinoic acid (4-oxo-9cRA) is identified as a major plasma metabolite of 9-cis retinoic acid. Plasma levels of 4-oxo-9-cRA were initially 71% of those of 9cRA, but in contrast to 9cRA, there was no decline in plasma levels.Despite a decline in	http://www.hmdb.ca/metabolites/HMDB12789	|Endogenous|Food|
5.01_279.1747m/z	HMDB12789	C20H26O3	1.3	81.04	279.17	5.01	4.6e-06	11.59	4-Oxo-13-cis-retinoate	4-oxo-9-cis retinoic acid (4-oxo-9cRA) is identified as a major plasma metabolite of 9-cis retinoic acid. Plasma levels of 4-oxo-9-cRA were initially 71% of those of 9cRA, but in contrast to 9cRA, there was no decline in plasma levels.Despite a decline in	http://www.hmdb.ca/metabolites/HMDB12789	|Endogenous|Food|
1.72_121.0387m/z	HMDB02320	C6H8N2O3	-6.3	92.35	121.04	1.72	0.009	5.16	Imidazolelactic acid	Imidazolelactic acid is the component of normal human urine. (PMID: 5856262). histidine loading causes an increase in the excretion of imidazolelactic acid. (PMID: 6021220). During pregnancy the values for imidazolelactic acid in urine is increased 3-fold	http://www.hmdb.ca/metabolites/HMDB02320	|Endogenous|
1.72_121.0387m/z	HMDB01014	C6H8N2O3	-6.3	92.35	121.04	1.72	0.009	5.16	4-Imidazolone-5-propionic acid	4-Imidazolone-5-propanoate is a metabolite of histidine metabolism. It is produced from urocanic acid by the enzyme urocanate hydratase [EC:4.2.1.49]. 4-Imidazolone-5-propionic acid can spontaneously decay to 4-oxoglutaramate or formylisoglutamine. It is	http://www.hmdb.ca/metabolites/HMDB01014	|Endogenous|
1.72_121.0387m/z	HMDB00544	C6H8N2O3	-6.3	92.35	121.04	1.72	0.009	5.16	5-Hydroxymethyl-4-methyluracil	5-Hydroxymethyl-6-methyl- 2,4-(1H,3H)-pyrimidinedione. Uracil derivative used in combination with toxic antibiotics to lessen their toxicity; also to stimulate leukopoiesis and immunity.	http://www.hmdb.ca/metabolites/HMDB00544	|Endogenous|
1.72_121.0387m/z	HMDB00301	C6H6N2O2	-7.1	92.58	121.04	1.72	0.009	5.16	Urocanic acid	Urocanic acid is a breakdown (deamination) product of histidine. In the liver, urocanic acid is an intermediate in the conversion of histidine to glutamic acid, whereas in the epidermis, it accumulates and may be both a UV protectant and an immunoregulato	http://www.hmdb.ca/metabolites/HMDB00301	|Endogenous|
1.72_121.0387m/z	HMDB02730	C6H6N2O2	-7.1	92.58	121.04	1.72	0.009	5.16	Nicotinamide N-oxide	Nicotinamide N-oxide is recognized as an in vivo metabolite of nicotinamide which is a precurser of nicotinamide-adenine dinucleotide (NAD+) in animals. The enzyme that catalyses the reduction of nicotinamide N-oxide to nicotinamide in liver is xanthine o	http://www.hmdb.ca/metabolites/HMDB02730	|Endogenous|
4.24_211.1087m/z	HMDB11172	C10H18N2O5	4	91.44	211.11	4.24	0.0013	2.2	L-gamma-glutamyl-L-valine	L-gamma-glutamyl-l-valine is a proteolytic breakdown product of larger proteins. It belongs to the family of N-acyl-alpha Amino Acids and Derivatives. These are compounds containing an alpha amino acid which bears an acyl group at his terminal nitrogen at	http://www.hmdb.ca/metabolites/HMDB11172	|Endogenous|
4.24_211.1087m/z	HMDB28925	C10H18N2O5	4	91.44	211.11	4.24	0.0013	2.2	Leucyl-Aspartate	Leucyl-Aspartate is a dipeptide composed of leucine and aspartate. It is an incomplete breakdown product of protein digestion or protein catabolism. Some dipeptides are known to have physiological or cell-signaling effects although most are simply short-l	http://www.hmdb.ca/metabolites/HMDB28925	|Endogenous|
4.24_211.1087m/z	HMDB28757	C10H18N2O5	4	91.44	211.11	4.24	0.0013	2.2	Aspartyl-Leucine	Aspartyl-Leucine is a dipeptide composed of aspartate and leucine. It is an incomplete breakdown product of protein digestion or protein catabolism. Some dipeptides are known to have physiological or cell-signaling effects although most are simply short-l	http://www.hmdb.ca/metabolites/HMDB28757	|Endogenous|
4.24_211.1087m/z	HMDB11166	C10H18N2O5	4	91.44	211.11	4.24	0.0013	2.2	L-beta-aspartyl-L-leucine	L-beta-aspartyl-l-leucine is a proteolytic breakdown product of larger proteins. It belongs to the family of N-acyl-alpha Amino Acids and Derivatives. These are compounds containing an alpha amino acid which bears an acyl group at his terminal nitrogen at	http://www.hmdb.ca/metabolites/HMDB11166	|Endogenous|
4.24_211.1087m/z	HMDB28756	C10H18N2O5	4	91.44	211.11	4.24	0.0013	2.2	Aspartyl-Isoleucine	Aspartyl-Isoleucine is a dipeptide composed of aspartate and isoleucine. It is an incomplete breakdown product of protein digestion or protein catabolism. Some dipeptides are known to have physiological or cell-signaling effects although most are simply s	http://www.hmdb.ca/metabolites/HMDB28756	|Endogenous|
4.24_211.1087m/z	HMDB28903	C10H18N2O5	4	91.44	211.11	4.24	0.0013	2.2	Isoleucyl-Aspartate	Isoleucyl-Aspartate is a dipeptide composed of isoleucine and aspartate. It is an incomplete breakdown product of protein digestion or protein catabolism. Some dipeptides are known to have physiological or cell-signaling effects although most are simply s	http://www.hmdb.ca/metabolites/HMDB28903	|Endogenous|
4.24_211.1087m/z	HMDB29018	C10H16N2O4	4.3	91.68	211.11	4.24	0.0013	2.2	Prolyl-Hydroxyproline	Prolyl-Hydroxyproline is a dipeptide composed of proline and hydroxyproline. It is an incomplete breakdown product of protein digestion or protein catabolism. Some dipeptides are known to have physiological or cell-signaling effects although most are simp	http://www.hmdb.ca/metabolites/HMDB29018	|Endogenous|
4.24_211.1087m/z	HMDB06695	C10H16N2O4	4.3	91.68	211.11	4.24	0.0013	2.2	Prolylhydroxyproline	Prolylhydroxyproline is a dipeptide. Prolylhydroxyproline is a marker of bone collagen degradation, showing high sensitivity for the diagnosis of osteoporosis. Prolylhydroxyproline has been suggested as a possible alternative to hydroxyproline determinati	http://www.hmdb.ca/metabolites/HMDB06695	|Endogenous|
4.24_211.1087m/z	HMDB28871	C10H16N2O4	4.3	91.68	211.11	4.24	0.0013	2.2	Hydroxyprolyl-Proline	Hydroxyprolyl-Proline is a dipeptide composed of hydroxyproline and proline. It is an incomplete breakdown product of protein digestion or protein catabolism. Some dipeptides are known to have physiological or cell-signaling effects although most are simp	http://www.hmdb.ca/metabolites/HMDB28871	|Endogenous|
4.24_211.1087m/z	HMDB00239	C8H11NO3	5.8	94.35	211.11	4.24	0.0013	2.2	Pyridoxine	The 4-methanol form of vitamin B6 which is converted to pyridoxal phosphate which is a coenzyme for synthesis of amino acids, neurotransmitters (serotonin, norepinephrine), sphingolipids, aminolevulinic acid. Although pyridoxine and Vitamin B6 are still f	http://www.hmdb.ca/metabolites/HMDB00239	|Endogenous|
4.24_211.1087m/z	HMDB04817	C8H11NO3	5.8	94.35	211.11	4.24	0.0013	2.2	5-Hydroxydopamine	5-Hydroxydopamine is a naturally occurring amine in human urine. 5-Hydroxydopamine concentration in urine of DOPA treated Parkinson's patients was significantly higher than inpatients not treated or normal controls. (PMID 8255370).	http://www.hmdb.ca/metabolites/HMDB04817	|Endogenous|
4.54_263.1981m/z	HMDB12535	C17H28O3	-8.6	84.6	263.2	4.54	2.6e-05	2.95	12S-HHT	12(S)-HHTrE is an unusual product of the cyclooxygenase (COX) pathway and one of the primary arachidonic acid metabolites of the human platelet.1 It is biosynthesized by thromboxane (TX) synthesis from prostaglandin H2 (PGH2) concurrently with TXA2. The b	http://www.hmdb.ca/metabolites/HMDB12535	|Endogenous|Food|
4.54_263.1981m/z	HMDB00557	C6H13NO2	6.1	95.29	263.2	4.54	2.6e-05	2.95	L-Alloisoleucine	L-alloisoleucine is a branched chain amino acid and is a stereo-isomer of L-isoleucine. It is a common constituent of human plasma (albeit at low levels). L-alloisoleucine is produced as a byproduct of isoleucine transamination. L-Isoleucine is one of the	http://www.hmdb.ca/metabolites/HMDB00557	|Endogenous|
4.54_263.1981m/z	HMDB01645	C6H13NO2	6.1	95.29	263.2	4.54	2.6e-05	2.95	L-Norleucine	L-Norleucine is an unnatural amino acid that is used experimentally to study protein structure and function. It is structurally similar to methionine, however it does not contain sulfur. Aminocaproic acid works as an antifibrinolytic. It is a derivative o	http://www.hmdb.ca/metabolites/HMDB01645	|Endogenous|
4.54_263.1981m/z	HMDB03640	C6H13NO2	6.1	95.29	263.2	4.54	2.6e-05	2.95	Beta-Leucine	Beta-leucine is a metabolite that is in the middle of a controversy over its presence in the human body. While there are reports that claim it as a human metabolite, there are others that deny its existence. Two examples:. Circulating levels of beta-leuci	http://www.hmdb.ca/metabolites/HMDB03640	|Endogenous|
4.54_263.1981m/z	HMDB13773	C6H13NO2	6.1	95.29	263.2	4.54	2.6e-05	2.95	D-Leucine	An essential branched-chain amino acid important for hemoglobin formation. [PubChem]; Branched chain amino acids (BCAA) are essential amino acids whose carbon structure is marked by a branch point. These three amino acids are critical to human life and ar	http://www.hmdb.ca/metabolites/HMDB13773	|Endogenous|
3.67_271.1032m/z	HMDB28939	C10H20N2O4	-9.9	88.09	271.1	3.67	0.019	-2.18	Leucyl-Threonine	Leucyl-Threonine is a dipeptide composed of leucine and threonine. It is an incomplete breakdown product of protein digestion or protein catabolism. Some dipeptides are known to have physiological or cell-signaling effects although most are simply short-l	http://www.hmdb.ca/metabolites/HMDB28939	|Endogenous|
5.67_172.0434m/z	HMDB31200	C7H13NO4S	3.6	90.78	172.04	5.67	0.022	-2.32	2-Methyl-2-[(1-oxo-2-propenyl)amino]-1-propanesulfonic acid	2-Methyl-2-[(1-oxo-2-propenyl)amino]-1-propanesulfonic acid is a fda approved for use in polymer components of food-contact paper and board adhesives 2-Methyl-2-[(1-oxo-2-propenyl)amino]-1-propanesulfonic acid belongs to the family of Sulfonic Acids. The	http://www.hmdb.ca/metabolites/HMDB31200	|Endogenous|Food|
7.79_322.1337m/z	HMDB11664	C9H7N	8.5	90.38	322.13	7.79	0.037	Infinity	3-Methylene-indolenine	3-Methylene-indolenine is an electrophilic molecule produced by the action of cytochrome P450 2F1 on 3-methylindole (3MI). 3-Methylindole (3MI) is a naturally occurring pulmonary toxin that requires metabolic activation. In particular, 3MI-induced pneumot	http://www.hmdb.ca/metabolites/HMDB11664	|Endogenous|
6.69_575.2743m/z	HMDB28889	C12H20N4O3	7.5	85.8	575.27	6.69	0.021	Infinity	Histidinyl-Leucine	Histidinyl-Leucine is a dipeptide composed of histidine and leucine. It is an incomplete breakdown product of protein digestion or protein catabolism. Some dipeptides are known to have physiological or cell-signaling effects although most are simply short	http://www.hmdb.ca/metabolites/HMDB28889	|Endogenous|
6.69_575.2743m/z	HMDB28909	C12H20N4O3	7.5	85.8	575.27	6.69	0.021	Infinity	Isoleucyl-Histidine	Isoleucyl-Histidine is a dipeptide composed of isoleucine and histidine. It is an incomplete breakdown product of protein digestion or protein catabolism. Some dipeptides are known to have physiological or cell-signaling effects although most are simply s	http://www.hmdb.ca/metabolites/HMDB28909	|Endogenous|
6.69_575.2743m/z	HMDB28888	C12H20N4O3	7.5	85.8	575.27	6.69	0.021	Infinity	Histidinyl-Isoleucine	Histidinyl-Isoleucine is a dipeptide composed of histidine and isoleucine. It is an incomplete breakdown product of protein digestion or protein catabolism. Some dipeptides are known to have physiological or cell-signaling effects although most are simply	http://www.hmdb.ca/metabolites/HMDB28888	|Endogenous|
6.69_575.2743m/z	HMDB28931	C12H20N4O3	7.5	85.8	575.27	6.69	0.021	Infinity	Leucyl-Histidine	Leucyl-Histidine is a dipeptide composed of leucine and histidine. It is an incomplete breakdown product of protein digestion or protein catabolism. Some dipeptides are known to have physiological or cell-signaling effects although most are simply short-l	http://www.hmdb.ca/metabolites/HMDB28931	|Endogenous|
7.98_229.1423m/z	HMDB00413	C12H22O5	-4.5	89.22	229.14	7.98	7e-05	2.48	3-Hydroxydodecanedioic acid	3-Hydroxydecanedioic acid appears in the urine of children affected with peroxisomal disorders. Peroxisomal biogenesis disorders (PBDs) are characterized by generalized peroxisomal dysfunction due to defective assembly of the organelle and include the Zel	http://www.hmdb.ca/metabolites/HMDB00413	|Endogenous|Food|
7.98_229.1423m/z	HMDB10719	C6H10O2	-4.9	96.02	229.14	7.98	7e-05	2.48	trans-Hex-2-enoic acid	trans-Hex-2-enoic acid is fatty acid formed by the action of fatty acid synthases from acetyl-CoA and malonyl-CoA precursors. It is involved in the pathway, fatty acid biosynthesis. Specifically, it is the product of reaction between (R)-3-Hydroxyhexanoic	http://www.hmdb.ca/metabolites/HMDB10719	|Endogenous|Food|
7.98_229.1423m/z	HMDB29487	C6H10O2	-4.9	96.02	229.14	7.98	7e-05	2.48	Allyl propionate	Allyl propionate is used in fruit flavours Allyl propionate belongs to the family of Carboxylic Acid Esters. These are carboxylic acid derivatives in which the carbo atom from the carbonyl group is atached to an alkyl or oaryl moiety through an oxygen at	http://www.hmdb.ca/metabolites/HMDB29487	|Endogenous|Food|
7.98_229.1423m/z	HMDB03843	C6H10O2	-4.9	96.02	229.14	7.98	7e-05	2.48	Gamma-Caprolactone	4-hydroxy-Hexanoic acid gamma-lactone is occasionally found as a volatile component of human urine. 4-hydroxy-Hexanoic acid gamma-lactone has been found in the polar fraction of human blood. Biological fluids such as blood and urine have been shown to con	http://www.hmdb.ca/metabolites/HMDB03843	|Endogenous|
9.57_313.1626m/z	HMDB28956	C12H26N4O3	-3.7	89.77	313.16	9.57	0.00034	2.63	Lysyl-Lysine	Lysyl-Lysine is a dipeptied compoosed of two lysine residues. It is an incomplete breakdown product of protein digestion or protein catabolism. Some dipeptides are known to have physiological or cell-signaling effects although most are simply short-lived	http://www.hmdb.ca/metabolites/HMDB28956	|Endogenous|
6.64_122.0593m/z	HMDB00459	C7H11NO3	-4.8	81.83	122.06	6.64	0.0038	2.35	3-Methylcrotonylglycine	3-Methylcrotonylglycine is an acyl glycine. Acyl glycines are normally minor metabolites of fatty acids. However, the excretion of certain acyl glycines is increased in several inborn errors of metabolism. In certain cases the measurement of these metabol	http://www.hmdb.ca/metabolites/HMDB00459	|Endogenous|
6.64_122.0593m/z	HMDB00959	C7H11NO3	-4.8	81.83	122.06	6.64	0.0038	2.35	Tiglylglycine	Tiglylglycine is an acyl glycine. Acyl glycines are normally minor metabolites of fatty acids. However, the excretion of certain acyl glycines is increased in several inborn errors of metabolism. In certain cases the measurement of these metabolites in bo	http://www.hmdb.ca/metabolites/HMDB00959	|Endogenous|
6.64_122.0593m/z	HMDB12153	C7H9NO2	-5.4	81.91	122.06	6.64	0.0038	2.35	3,4-Dihydroxybenzylamine	3,4-Dihydroxybenzylamine is an alternative substrates for dopamine that is a member of the catecholamine family in the brain, and is a precursor to epinephrine and norepinephrine. Catecholamines contain a catechol group, and are derived from the amino aci	http://www.hmdb.ca/metabolites/HMDB12153	|Endogenous|
6.64_122.0593m/z	HMDB04461	C7H7NO	-6.2	82	122.06	6.64	0.0038	2.35	Benzamide	Benzamide is an intermediate in the Benzoate degradation via CoA ligation. Benzamides are a class of chemical compounds derived from Benzamid, the carbonic acid amide of benzoic acid. In psychiatry some substituted benzamides are therapeutically used as n	http://www.hmdb.ca/metabolites/HMDB04461	|Endogenous|
5.86_295.1519m/z	HMDB30555	C16H22O5	-7	89.06	295.15	5.86	9.3e-09	3.13	Tocopheronic acid	Human metabolite of a-Tocopherol <ht>BDR14-R</ht> Tocopheronic acid belongs to the family of Medium-chain Keto Acids and Derivatives. These are keto acids with a 6 to 12 carbon atoms long side chain.	http://www.hmdb.ca/metabolites/HMDB30555	|Endogenous|Food|
5.96_240.1225m/z	HMDB13130	C12H21NO6	-1.9	90.53	240.12	5.96	1.9e-08	2.89	Glutarylcarnitine	Glutaryl-L-carnitine.	http://www.hmdb.ca/metabolites/HMDB13130	|Endogenous|Food|
5.96_240.1225m/z	HMDB00824	C10H19NO4	8.7	92.96	240.12	5.96	1.9e-08	2.89	Propionylcarnitine	Propionylcarnitine is present in high abundance in the urine of patients with Methylmalonyl-CoA mutase (MUT) deficiency, (together with Methylmalonic acid). MUT is a mitochondrial enzyme that catalyzes the isomerization of methylmalonyl-CoA to succinyl-Co	http://www.hmdb.ca/metabolites/HMDB00824	|Endogenous|Food|
5.74_344.1211m/z	HMDB28991	C13H16N2O5	-2	91.42	344.12	5.74	0.0091	2.55	Phenylalanyl-Aspartate	Phenylalanyl-Aspartate is a dipeptide composed of phenylalanine and aspartate. It is an incomplete breakdown product of protein digestion or protein catabolism. Some dipeptides are known to have physiological or cell-signaling effects although most are si	http://www.hmdb.ca/metabolites/HMDB28991	|Endogenous|
5.74_344.1211m/z	HMDB28760	C13H16N2O5	-2	91.42	344.12	5.74	0.0091	2.55	Aspartyl-Phenylalanine	Aspartyl-Phenylalanine is a dipeptide composed of aspartate and phenylalanine. It is an incomplete breakdown product of protein digestion or protein catabolism. Some dipeptides are known to have physiological or cell-signaling effects although most are si	http://www.hmdb.ca/metabolites/HMDB28760	|Endogenous|
5.74_344.1211m/z	HMDB11167	C13H16N2O5	-2	91.42	344.12	5.74	0.0091	2.55	L-beta-aspartyl-L-phenylalanine	L-beta-aspartyl-l-phenylalanine is a proteolytic breakdown product of larger proteins. It belongs to the family of N-acyl-alpha Amino Acids and Derivatives. These are compounds containing an alpha amino acid which bears an acyl group at his terminal nitro	http://www.hmdb.ca/metabolites/HMDB11167	|Endogenous|
5.86_162.0411m/z	HMDB00704	C6H5N5O2	0.1	93.41	162.04	5.86	4.5e-10	2.67	Isoxanthopterin	Isoxanthopterin is a pteridine normally present in plasma, urine, and other bodily fluids also vary from normal concentrations in some disease states and also have diagnostic value. Pteridines' urinary concentrations seem to vary independently from each o	http://www.hmdb.ca/metabolites/HMDB00704	|Endogenous|
5.86_162.0411m/z	HMDB02273	C5H7NO5-2	8.4	95.88	162.04	5.86	4.5e-10	2.67	4-Hydroxy-L-glutamic acid	4-Hydroxy-L-glutamic acid is an intermediate in the metabolism of gamma-hydroxyglutamic acid. Specifically 4-Hydroxy-L-glutamic acid combines with 2-oxoglutarate to produce 4-hydroxy-2-oxoglutarate and glutamate. The reaction can be described as: 4-Hydrox	http://www.hmdb.ca/metabolites/HMDB02273	|Endogenous|
5.86_162.0411m/z	HMDB02467	C5H7NO5	8.4	95.88	162.04	5.86	4.5e-10	2.67	A-Ketoglutaric acid oxime	Alpha-Ketoglutaric acid oxime is an organic acid being described in human urine in some cases of maple syrup urine disease. (PMID: 7438430, 699273).	http://www.hmdb.ca/metabolites/HMDB02467	|Endogenous|
6.45_211.1455m/z	HMDB28915	C11H20N2O3	6.1	91.18	211.15	6.45	0.00018	2.73	Isoleucyl-Proline	Isoleucyl-Proline is a dipeptide composed of isoleucine and proline. It is an incomplete breakdown product of protein digestion or protein catabolism. Some dipeptides are known to have physiological or cell-signaling effects although most are simply short	http://www.hmdb.ca/metabolites/HMDB28915	|Endogenous|
6.45_211.1455m/z	HMDB11175	C11H20N2O3	6.1	91.18	211.15	6.45	0.00018	2.73	L-leucyl-L-proline	L-leucyl-l-proline is a proteolytic breakdown product of larger proteins. It belongs to the family of Peptides. These are compounds containing an amide derived from two or more amino carboxylic acid molecules (the same or different) by formation of a cova	http://www.hmdb.ca/metabolites/HMDB11175	|Endogenous|
6.45_211.1455m/z	HMDB28937	C11H20N2O3	6.1	91.18	211.15	6.45	0.00018	2.73	Leucyl-Proline	Leucyl-Proline is a dipeptide composed of leucine and proline. It is an incomplete breakdown product of protein digestion or protein catabolism. Some dipeptides are known to have physiological or cell-signaling effects although most are simply short-lived	http://www.hmdb.ca/metabolites/HMDB28937	|Endogenous|
6.45_211.1455m/z	HMDB11174	C11H20N2O3	6.1	91.18	211.15	6.45	0.00018	2.73	L-isoleucyl-L-proline	L-isoleucyl-l-proline is a proteolytic breakdown product of larger proteins. It belongs to the family of Peptides. These are compounds containing an amide derived from two or more amino carboxylic acid molecules (the same or different) by formation of a c	http://www.hmdb.ca/metabolites/HMDB11174	|Endogenous|
6.12_162.0411m/z	HMDB00704	C6H5N5O2	0.1	93.18	162.04	6.12	1.7e-09	2.68	Isoxanthopterin	Isoxanthopterin is a pteridine normally present in plasma, urine, and other bodily fluids also vary from normal concentrations in some disease states and also have diagnostic value. Pteridines' urinary concentrations seem to vary independently from each o	http://www.hmdb.ca/metabolites/HMDB00704	|Endogenous|
6.12_162.0411m/z	HMDB02273	C5H7NO5-2	8.4	95.66	162.04	6.12	1.7e-09	2.68	4-Hydroxy-L-glutamic acid	4-Hydroxy-L-glutamic acid is an intermediate in the metabolism of gamma-hydroxyglutamic acid. Specifically 4-Hydroxy-L-glutamic acid combines with 2-oxoglutarate to produce 4-hydroxy-2-oxoglutarate and glutamate. The reaction can be described as: 4-Hydrox	http://www.hmdb.ca/metabolites/HMDB02273	|Endogenous|
6.12_162.0411m/z	HMDB02467	C5H7NO5	8.4	95.66	162.04	6.12	1.7e-09	2.68	A-Ketoglutaric acid oxime	Alpha-Ketoglutaric acid oxime is an organic acid being described in human urine in some cases of maple syrup urine disease. (PMID: 7438430, 699273).	http://www.hmdb.ca/metabolites/HMDB02467	|Endogenous|
6.12_295.1520m/z	HMDB30555	C16H22O5	-6.7	87.17	295.15	6.12	0.00086	5.72	Tocopheronic acid	Human metabolite of a-Tocopherol <ht>BDR14-R</ht> Tocopheronic acid belongs to the family of Medium-chain Keto Acids and Derivatives. These are keto acids with a 6 to 12 carbon atoms long side chain.	http://www.hmdb.ca/metabolites/HMDB30555	|Endogenous|Food|
3.67_268.0816n	HMDB00481	C10H12N4O5	3.1862	96.4855	537.168	3.66947	4.60195e-05	-2.32367	Allopurinol riboside	Allopurinol is an analog of the natural purines in the body, and is quickly metabolized to oxypurines which is also a xanthine oxidase inhibitor. Allopurinol is a white, powdery drug used to treat gout. Its use in the United States was started in 1964. It	http://www.hmdb.ca/metabolites/HMDB00481	|Endogenous|
3.67_268.0816n	HMDB00195	C10H12N4O5	3.1862	96.4855	537.168	3.66947	4.60195e-05	-2.32367	Inosine	Inosine is a purine nucleoside that has hypoxanthine linked by the N9 nitrogen to the C1 carbon of ribose. It is an intermediate in the degradation of purines and purine nucleosides to uric acid and in pathways of purine salvage. It also occurs in the ant	http://www.hmdb.ca/metabolites/HMDB00195	|Drug metabolite|Endogenous|
21.61_338.3415m/z	HMDB03208	C20H40O	-0.713421	85.6741	338.342	21.611	0.0122732	-50.518	Thromboxane	Thromboxane is a member of the family of lipids known as eicosanoids. It is produced in platelets by thromboxane synthetase, which is produced from the endoperoxides by the cyclooxygenase (COX) enzyme from arachidonic acid. -- Wikipedia; Thromboxane is a	http://www.hmdb.ca/metabolites/HMDB03208	|Endogenous|
12.81_494.3232m/z	HMDB11590	C27H42O4	-2.05625	79.4239	494.323	12.8062	6.3102e-05	-10.7322	MG(24:6(6Z,9Z,12Z,15Z,18Z,21Z)/0:0/0:0)	MG(24:6(6Z,9Z,12Z,15Z,18Z,21Z)/0:0/0:0) is a monoacylglyceride. A monoglyceride, more correctly known as a monoacylglycerol, is a glyceride consisting of one fatty acid chain covalently bonded to a glycerol molecule through an ester linkage. Monoacylglyce	http://www.hmdb.ca/metabolites/HMDB11590	|Endogenous|Food|
12.81_494.3232m/z	HMDB11560	C27H42O4	-2.05625	79.4239	494.323	12.8062	6.3102e-05	-10.7322	MG(0:0/24:6(6Z,9Z,12Z,15Z,18Z,21Z)/0:0)	MG(0:0/24:6(6Z,9Z,12Z,15Z,18Z,21Z)/0:0) is a monoacylglyceride. A monoglyceride, more correctly known as a monoacylglycerol, is a glyceride consisting of one fatty acid chain covalently bonded to a glycerol molecule through an ester linkage. Monoacylglyce	http://www.hmdb.ca/metabolites/HMDB11560	|Endogenous|Food|
3.67_271.1032m/z	HMDB04081	C13H16N2O3	-8.61292	85.5389	271.103	3.66947	0.0187853	-2.18219	6-Hydroxymelatonin	Melatonin is a hormone that is metabolized by cytochrome P450 (CYP) 1A2 to its main primary metabolite 6-hydroxymelatonin. (PMID 11452239).	http://www.hmdb.ca/metabolites/HMDB04081	|Drug metabolite|Endogenous|
11.22_341.1930m/z	HMDB41944	C15H23N3O2	-6.33213	83.5492	341.193	11.222	0.00296795	11.6244	N-Acetylprocainamide	N-Acetylprocainamide (NAPA or acecainide) is the N-acetylated metabolite of procainamide. It is a Class III antiarrhythmic agent, whereas procainamide is a Class Ia antiarrhythmic drug. It is only partially as active as procainamide; when checking levels	http://www.hmdb.ca/metabolites/HMDB41944	|Endogenous|
10.53_250.1790m/z	HMDB33848	C11H22O2	6.9471	92.9104	250.179	10.5291	1.96475e-07	-3.33256	Methyl decanoate	Methyl decanoate is a constituent of many plants.	http://www.hmdb.ca/metabolites/HMDB33848	|Endogenous|Food|
15.08_335.1234m/z	HMDB01013	C16H20N2O7	-1.03172	88.8977	335.123	15.077	0.00864122	-2.31586	Cotinine glucuronide	Cotinineglucuronide is a natural human metabolite of Cotinine generated in the liver by UDP glucuonyltransferase. A cotinine derviative that is dervied through glucuronidation by UDP-glucuronosyltransferases (UGTs) in the liver. Glucuronidation is used to	http://www.hmdb.ca/metabolites/HMDB01013	|Drug metabolite|Endogenous|
16.49_473.3422m/z	HMDB04198	C31H46O2	7.16297	79.3913	473.342	16.4864	1.27856e-08	36.76	Reduced Vitamin K (phylloquinone)	Vitamin K is a family of fat-soluble compounds with a common chemical structure based on 2-methyl-1,4-naphthoquinone. Phylloquinone is often called vitamin K1, phytomenadione or phytonadione. Sometimes a distinction is made with phylloquinone considered n	http://www.hmdb.ca/metabolites/HMDB04198	|Endogenous|Food|
12.35_468.3078m/z	HMDB11555	C25H40O4	-1.61512	83.8557	468.308	12.3518	0.00420488	-4.69551	MG(0:0/22:5(4Z,7Z,10Z,13Z,16Z)/0:0)	MG(0:0/22:5(4Z,7Z,10Z,13Z,16Z)/0:0) is a monoacylglyceride. A monoglyceride, more correctly known as a monoacylglycerol, is a glyceride consisting of one fatty acid chain covalently bonded to a glycerol molecule through an ester linkage. Monoacylglycerol	http://www.hmdb.ca/metabolites/HMDB11555	|Endogenous|Food|
12.35_468.3078m/z	HMDB11585	C25H40O4	-1.61512	83.8557	468.308	12.3518	0.00420488	-4.69551	MG(22:5(4Z,7Z,10Z,13Z,16Z)/0:0/0:0)	MG(22:5(4Z,7Z,10Z,13Z,16Z)/0:0/0:0) is a monoacylglyceride. A monoglyceride, more correctly known as a monoacylglycerol, is a glyceride consisting of one fatty acid chain covalently bonded to a glycerol molecule through an ester linkage. Monoacylglycerol	http://www.hmdb.ca/metabolites/HMDB11585	|Endogenous|Food|
12.35_468.3078m/z	HMDB11586	C25H40O4	-1.61512	83.8557	468.308	12.3518	0.00420488	-4.69551	MG(22:5(7Z,10Z,13Z,16Z,19Z)/0:0/0:0)	MG(22:5(7Z,10Z,13Z,16Z,19Z)/0:0/0:0) is a monoacylglyceride. A monoglyceride, more correctly known as a monoacylglycerol, is a glyceride consisting of one fatty acid chain covalently bonded to a glycerol molecule through an ester linkage. Monoacylglycerol	http://www.hmdb.ca/metabolites/HMDB11586	|Endogenous|Food|
12.35_468.3078m/z	HMDB11556	C25H40O4	-1.61512	83.8557	468.308	12.3518	0.00420488	-4.69551	MG(0:0/22:5(7Z,10Z,13Z,16Z,19Z)/0:0)	MG(0:0/22:5(7Z,10Z,13Z,16Z,19Z)/0:0) is a monoacylglyceride. A monoglyceride, more correctly known as a monoacylglycerol, is a glyceride consisting of one fatty acid chain covalently bonded to a glycerol molecule through an ester linkage. Monoacylglycerol	http://www.hmdb.ca/metabolites/HMDB11556	|Endogenous|Food|
5.30_279.1743m/z	HMDB06285	C20H26O3	-0.183955	85.2504	279.174	5.29998	4.06678e-05	6.89367	4-oxo-Retinoic acid	4-oxo-Retinoic acid is a biologically active geometric isomer of retinoic acid (RA). 4-oxo-retinoic acid is generated from its precursor canthaxanthin and enhances gap junctional communication in cells. Metabolic transformation of all-trans RA to 4-hydrox	http://www.hmdb.ca/metabolites/HMDB06285	|Drug metabolite|Endogenous|Food|
5.01_279.1747m/z	HMDB06285	C20H26O3	1.26212	81.0378	279.175	5.00905	4.64834e-06	11.5938	4-oxo-Retinoic acid	4-oxo-Retinoic acid is a biologically active geometric isomer of retinoic acid (RA). 4-oxo-retinoic acid is generated from its precursor canthaxanthin and enhances gap junctional communication in cells. Metabolic transformation of all-trans RA to 4-hydrox	http://www.hmdb.ca/metabolites/HMDB06285	|Drug metabolite|Endogenous|Food|
4.24_211.1087m/z	HMDB01537	C8H11NO3	5.79915	94.3528	211.109	4.2401	0.00128765	2.20299	6-Hydroxydopamine	6-Hydroxydopamine is a naturally occurring amine in human urine. 5-Hydroxydopamine concentration in urine of DOPA treated Parkinson's patients was significantly higher than inpatients not treated or normal controls. (PMID 8255370). 6-hydroxydopamine has b	http://www.hmdb.ca/metabolites/HMDB01537	|Drug metabolite|Endogenous|
4.24_211.1087m/z	HMDB00216	C8H11NO3	5.79915	94.3528	211.109	4.2401	0.00128765	2.20299	Norepinephrine	Precursor of epinephrine that is secreted by the adrenal medulla and is a widespread central and autonomic neurotransmitter. Norepinephrine is the principal transmitter of most postganglionic sympathetic fibers and of the diffuse projection system in the	http://www.hmdb.ca/metabolites/HMDB00216	|Endogenous|
7.98_229.1423m/z	HMDB00453	C6H10O2	-4.89061	96.0169	229.142	7.97882	7.01289e-05	2.47755	Delta-Hexanolactone	D-Hexanolactone is the lactone of 5-hydroxy-Hexanoic acid. Lactones are internal esters that exist in equilibrium between their closed (lactone) and open (hydroxy acid) forms in an aqueous environment. The lactone/hydroxy acid ratio at equilibrium is pH-d	http://www.hmdb.ca/metabolites/HMDB00453	|Endogenous|
