# Supplementary material for: Metabolic consequences of inflammatory disruption of the blood-brain barrier in an organ-on-chip model of the human neurovascular unit
Source: Springer Nature journal article supplement (doi:10.1186/s12974-016-0760-y), 2016-12-01
Supplement: MOESM1 [file 11931230]

**Figure S1.**

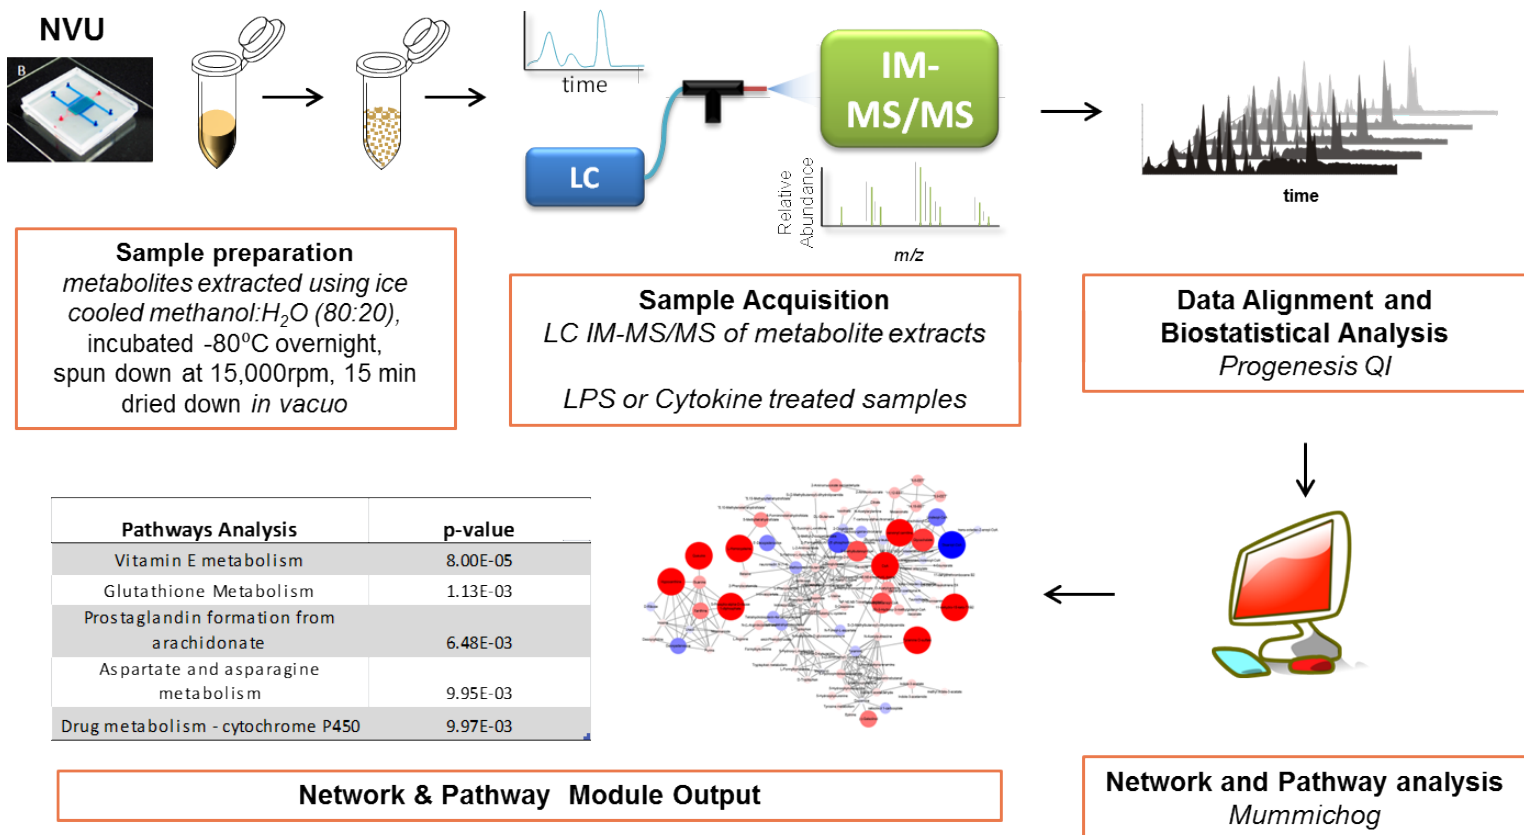

**Figure S1. Experimental design and sample workflow**
