# Supplementary material for: Metabolic consequences of inflammatory disruption of the blood-brain barrier in an organ-on-chip model of the human neurovascular unit
Source: Springer Nature journal article supplement (doi:10.1186/s12974-016-0760-y), 2016-12-01
Supplement: MOESM2 [file 11931230]

**Table S1.**

| Cytokine      |               | Vascular Chamber |          | Brain Chamber |          |
|---------------|---------------|------------------|----------|---------------|----------|
|               |               | 6 hours          | 24 hours | 6 hours       | 24 hours |
| GM-CSF        | fold $\Delta$ | 8                | 2        | 3             | -3       |
|               | P-val         | 0.02             | N.S.     | 0.016         | N.S.     |
| IL12-p40      | fold $\Delta$ | 4                | 0        | 0             | 0        |
|               | P-val         | 0.0047           | N.S.     | N.S.          | N.S.     |
| IL-15         | fold $\Delta$ | 0                | 0        | 2             | 0        |
|               | P-val         | N.S.             | N.S.     | N.S.          | N.S.     |
| IL-16         | fold $\Delta$ | 2                | 2        | 2             | 2        |
|               | P-val         | 0.0067           | 0.05     | N.S.          | N.S.     |
| IL-17A        | fold $\Delta$ | -3               | -2       | 6             | 4        |
|               | P-val         | 0.05             | 0.05     | 0.001         | 0.002    |
| IL-1a         | fold $\Delta$ | 1                | 1        | 1             | 1        |
|               | P-val         | N.S.             | N.S.     | N.S.          | N.S.     |
| IL-5          | fold $\Delta$ | 1                | 1        | 3             | 2        |
|               | P-val         | N.S.             | 0.02     | 0.02          | N.S.     |
| IL-7          | fold $\Delta$ | 2                | 1        | 2             | 2        |
|               | P-val         | N.S.             | N.S.     | 0.03          | N.S.     |
| TNF-b         | fold $\Delta$ | 0                | -0.5     | 2             | 2        |
|               | P-val         | N.S.             | N.S.     | N.S.          | N.S.     |
| VEGF          | fold $\Delta$ | -2               | -4       | 2             | 1        |
|               | P-val         | N.S.             | N.S.     | N.S.          | N.S.     |
| TNF- $\alpha$ | fold $\Delta$ | 1.5              | 3        | 2             | 3        |
|               | P-val         | 0.01             | 0.01     | 0.01          | 0.01     |
| IL-1b         | fold $\Delta$ | 0                | 2        | 1.5           | 2        |
|               | P-val         | N.S.             | 0.01     | N.S.          | 0.001    |
